# Supplementary material
Source: HighWire-hosted journal article supplement (doi:10.1101/rna.077552.120)
Supplement: Supplemental_Table_S2.xlsx [file Supplemental_Table_S2.xlsx]

## Sheet: 1+4+S
1+4+S
CLUSTER MEDIUM
71 Cluster(s)
Annotation Cluster 1		Enrichment Score: 5.31	Count	P_Value	Benjamini
	GOTERM_BP_FAT	RNA localization	15	8.1e-09	1.5e-05
	GOTERM_BP_FAT	RNA transport	13	3.9e-07	0.00036
	GOTERM_BP_FAT	nucleic acid transport	13	3.9e-07	0.00036
	GOTERM_BP_FAT	establishment of RNA localization	13	3.9e-07	0.00036
	GOTERM_BP_FAT	nucleocytoplasmic transport	16	3.9e-07	0.00024
	GOTERM_BP_FAT	nuclear transport	16	4.6e-07	0.00021
	GOTERM_BP_FAT	nucleobase, nucleoside, nucleotide and nucleic acid transport	13	2e-06	0.00062
	GOTERM_BP_FAT	mRNA transport	11	7.2e-06	0.0019
	GOTERM_BP_FAT	nuclear export	8	0.00016	0.022
	GOTERM_BP_FAT	RNA export from nucleus	5	0.0081	0.29
	GOTERM_BP_FAT	mRNA export from nucleus	4	0.026	0.45
Annotation Cluster 2		Enrichment Score: 3.46	Count	P_Value	Benjamini
	GOTERM_BP_FAT	DNA metabolic process	29	6.7e-07	0.00025
	GOTERM_BP_FAT	DNA repair	18	4.3e-05	0.0098
	GOTERM_BP_FAT	response to DNA damage stimulus	21	4.4e-05	0.0089
	GOTERM_BP_FAT	cellular response to stress	25	0.0003	0.039
	GOTERM_BP_FAT	response to radiation	9	0.043	0.54
	GOTERM_BP_FAT	response to abiotic stimulus	12	0.1	0.68
Annotation Cluster 3		Enrichment Score: 3.34	Count	P_Value	Benjamini
	GOTERM_BP_FAT	chromosome organization	24	8e-05	0.014
	GOTERM_BP_FAT	chromatin modification	15	0.001	0.097
	GOTERM_BP_FAT	chromatin organization	18	0.0012	0.11
Annotation Cluster 4		Enrichment Score: 2.37	Count	P_Value	Benjamini
	GOTERM_BP_FAT	nucleocytoplasmic transport	16	3.9e-07	0.00024
	GOTERM_BP_FAT	nuclear transport	16	4.6e-07	0.00021
	GOTERM_BP_FAT	intracellular transport	29	8.6e-05	0.014
	GOTERM_BP_FAT	protein targeting	12	0.0034	0.22
	GOTERM_BP_FAT	protein import into nucleus, docking	4	0.0041	0.24
	GOTERM_BP_FAT	protein import into nucleus	7	0.0067	0.27
	GOTERM_BP_FAT	nuclear import	7	0.0074	0.28
	GOTERM_BP_FAT	protein localization in nucleus	7	0.01	0.32
	GOTERM_BP_FAT	protein localization	28	0.013	0.36
	GOTERM_BP_FAT	intracellular protein transport	15	0.015	0.38
	GOTERM_BP_FAT	cellular macromolecule localization	16	0.016	0.38
	GOTERM_BP_FAT	protein transport	24	0.025	0.45
	GOTERM_BP_FAT	establishment of protein localization	24	0.028	0.46
	GOTERM_BP_FAT	cellular protein localization	15	0.031	0.47
	GOTERM_BP_FAT	protein import	7	0.043	0.54
	GOTERM_BP_FAT	protein localization in organelle	7	0.067	0.62
	GOTERM_BP_FAT	cellular macromolecular complex assembly	11	0.094	0.67
	GOTERM_BP_FAT	cellular protein complex assembly	7	0.098	0.67
Annotation Cluster 5		Enrichment Score: 2.19	Count	P_Value	Benjamini
	GOTERM_BP_FAT	protein modification by small protein conjugation or removal	12	0.0003	0.036
	GOTERM_BP_FAT	protein ubiquitination	9	0.0023	0.17
	GOTERM_BP_FAT	modification-dependent protein catabolic process	22	0.0043	0.25
	GOTERM_BP_FAT	modification-dependent macromolecule catabolic process	22	0.0043	0.25
	GOTERM_BP_FAT	protein modification by small protein conjugation	9	0.0043	0.24
	GOTERM_BP_FAT	protein catabolic process	23	0.0052	0.26
	GOTERM_BP_FAT	macromolecule catabolic process	27	0.0054	0.25
	GOTERM_BP_FAT	proteolysis involved in cellular protein catabolic process	22	0.0071	0.28
	GOTERM_BP_FAT	cellular protein catabolic process	22	0.0075	0.27
	GOTERM_BP_FAT	cellular macromolecule catabolic process	24	0.015	0.38
	GOTERM_BP_FAT	ubiquitin-dependent protein catabolic process	11	0.021	0.42
	GOTERM_BP_FAT	proteolysis	26	0.18	0.82
Annotation Cluster 6		Enrichment Score: 1.68	Count	P_Value	Benjamini
	GOTERM_BP_FAT	chromatin modification	15	0.001	0.097
	GOTERM_BP_FAT	histone modification	6	0.091	0.66
	GOTERM_BP_FAT	covalent chromatin modification	6	0.1	0.68
Annotation Cluster 7		Enrichment Score: 1.6	Count	P_Value	Benjamini
	GOTERM_BP_FAT	regulation of cytoskeleton organization	11	0.00033	0.037
	GOTERM_BP_FAT	regulation of centrosome duplication	3	0.0054	0.26
	GOTERM_BP_FAT	regulation of centrosome cycle	3	0.0098	0.32
	GOTERM_BP_FAT	negative regulation of organelle organization	6	0.022	0.42
	GOTERM_BP_FAT	regulation of cell cycle process	7	0.024	0.44
	GOTERM_BP_FAT	regulation of microtubule cytoskeleton organization	4	0.048	0.57
	GOTERM_BP_FAT	negative regulation of cellular component organization	7	0.06	0.6
	GOTERM_BP_FAT	regulation of microtubule-based process	4	0.07	0.63
	GOTERM_BP_FAT	regulation of protein complex disassembly	4	0.077	0.64
	GOTERM_BP_FAT	negative regulation of cytoskeleton organization	4	0.092	0.66
	GOTERM_BP_FAT	negative regulation of protein complex disassembly	3	0.19	0.83
Annotation Cluster 8		Enrichment Score: 1.52	Count	P_Value	Benjamini
	GOTERM_BP_FAT	RNA processing	20	0.011	0.33
	GOTERM_BP_FAT	mRNA metabolic process	14	0.03	0.47
	GOTERM_BP_FAT	mRNA processing	12	0.05	0.58
	GOTERM_BP_FAT	RNA splicing	11	0.052	0.58
Annotation Cluster 9		Enrichment Score: 1.44	Count	P_Value	Benjamini
	GOTERM_BP_FAT	regulation of cytoskeleton organization	11	0.00033	0.037
	GOTERM_BP_FAT	regulation of cellular component biogenesis	8	0.021	0.42
	GOTERM_BP_FAT	regulation of actin cytoskeleton organization	6	0.03	0.47
	GOTERM_BP_FAT	regulation of protein complex assembly	6	0.031	0.47
	GOTERM_BP_FAT	regulation of actin filament-based process	6	0.034	0.48
	GOTERM_BP_FAT	regulation of cellular component size	10	0.085	0.65
	GOTERM_BP_FAT	regulation of actin filament polymerization	4	0.088	0.66
	GOTERM_BP_FAT	regulation of actin polymerization or depolymerization	4	0.12	0.72
	GOTERM_BP_FAT	regulation of actin filament length	4	0.12	0.74
	GOTERM_BP_FAT	regulation of protein polymerization	4	0.15	0.78
Annotation Cluster 10		Enrichment Score: 1.39	Count	P_Value	Benjamini
	GOTERM_BP_FAT	macromolecular complex subunit organization	25	0.0062	0.27
	GOTERM_BP_FAT	cellular macromolecular complex subunit organization	15	0.011	0.33
	GOTERM_BP_FAT	macromolecular complex assembly	20	0.062	0.61
	GOTERM_BP_FAT	protein complex biogenesis	16	0.072	0.63
	GOTERM_BP_FAT	protein complex assembly	16	0.072	0.63
	GOTERM_BP_FAT	cellular macromolecular complex assembly	11	0.094	0.67
	GOTERM_BP_FAT	cellular protein complex assembly	7	0.098	0.67
Annotation Cluster 11		Enrichment Score: 1.37	Count	P_Value	Benjamini
	GOTERM_BP_FAT	negative regulation of macromolecule biosynthetic process	20	0.011	0.33
	GOTERM_BP_FAT	negative regulation of cellular biosynthetic process	20	0.014	0.36
	GOTERM_BP_FAT	negative regulation of macromolecule metabolic process	24	0.017	0.38
	GOTERM_BP_FAT	negative regulation of biosynthetic process	20	0.017	0.39
	GOTERM_BP_FAT	negative regulation of nucleobase, nucleoside, nucleotide and nucleic acid metabolic process	18	0.023	0.43
	GOTERM_BP_FAT	negative regulation of nitrogen compound metabolic process	18	0.026	0.46
	GOTERM_BP_FAT	negative regulation of RNA metabolic process	13	0.053	0.58
	GOTERM_BP_FAT	regulation of transcription from RNA polymerase II promoter	21	0.076	0.63
	GOTERM_BP_FAT	negative regulation of transcription, DNA-dependent	12	0.09	0.66
	GOTERM_BP_FAT	negative regulation of transcription	14	0.12	0.72
	GOTERM_BP_FAT	negative regulation of gene expression	15	0.12	0.72
	GOTERM_BP_FAT	negative regulation of transcription from RNA polymerase II promoter	8	0.26	0.89
Annotation Cluster 12		Enrichment Score: 1.35	Count	P_Value	Benjamini
	GOTERM_BP_FAT	positive regulation of macromolecule metabolic process	29	0.0052	0.26
	GOTERM_BP_FAT	positive regulation of transcription, DNA-dependent	19	0.0059	0.27
	GOTERM_BP_FAT	positive regulation of RNA metabolic process	19	0.0064	0.27
	GOTERM_BP_FAT	positive regulation of gene expression	20	0.02	0.41
	GOTERM_BP_FAT	positive regulation of nucleobase, nucleoside, nucleotide and nucleic acid metabolic process	21	0.02	0.42
	GOTERM_BP_FAT	positive regulation of cellular biosynthetic process	22	0.027	0.47
	GOTERM_BP_FAT	positive regulation of nitrogen compound metabolic process	21	0.028	0.46
	GOTERM_BP_FAT	positive regulation of transcription	19	0.028	0.46
	GOTERM_BP_FAT	positive regulation of biosynthetic process	22	0.031	0.46
	GOTERM_BP_FAT	positive regulation of macromolecule biosynthetic process	21	0.032	0.46
	GOTERM_BP_FAT	positive regulation of transcription from RNA polymerase II promoter	13	0.06	0.61
	GOTERM_BP_FAT	regulation of transcription from RNA polymerase II promoter	21	0.076	0.63
	GOTERM_BP_FAT	transcription	47	0.22	0.86
	GOTERM_BP_FAT	regulation of transcription	55	0.33	0.92
	GOTERM_BP_FAT	regulation of RNA metabolic process	35	0.63	0.99
	GOTERM_BP_FAT	regulation of transcription, DNA-dependent	32	0.77	1
Annotation Cluster 13		Enrichment Score: 1.27	Count	P_Value	Benjamini
	GOTERM_BP_FAT	double-strand break repair	5	0.033	0.47
	GOTERM_BP_FAT	response to radiation	9	0.043	0.54
	GOTERM_BP_FAT	DNA recombination	6	0.055	0.58
	GOTERM_BP_FAT	response to ionizing radiation	4	0.11	0.71
Annotation Cluster 14		Enrichment Score: 1.26	Count	P_Value	Benjamini
	GOTERM_BP_FAT	regulation of small GTPase mediated signal transduction	12	0.011	0.33
	GOTERM_BP_FAT	regulation of Ras protein signal transduction	10	0.022	0.42
	GOTERM_BP_FAT	regulation of Ras GTPase activity	6	0.053	0.58
	GOTERM_BP_FAT	regulation of Rab protein signal transduction	4	0.064	0.61
	GOTERM_BP_FAT	regulation of Rab GTPase activity	4	0.064	0.61
	GOTERM_BP_FAT	regulation of GTPase activity	6	0.093	0.66
	GOTERM_BP_FAT	regulation of hydrolase activity	9	0.34	0.93
Annotation Cluster 15		Enrichment Score: 1.17	Count	P_Value	Benjamini
	GOTERM_BP_FAT	death	26	0.004	0.24
	GOTERM_BP_FAT	cell death	25	0.0072	0.28
	GOTERM_BP_FAT	negative regulation of apoptosis	15	0.0098	0.33
	GOTERM_BP_FAT	negative regulation of programmed cell death	15	0.011	0.32
	GOTERM_BP_FAT	negative regulation of cell death	15	0.011	0.33
	GOTERM_BP_FAT	programmed cell death	20	0.031	0.47
	GOTERM_BP_FAT	apoptosis	19	0.048	0.57
	GOTERM_BP_FAT	regulation of apoptosis	23	0.069	0.62
	GOTERM_BP_FAT	regulation of programmed cell death	23	0.075	0.63
	GOTERM_BP_FAT	regulation of cell death	23	0.075	0.63
	GOTERM_BP_FAT	anti-apoptosis	7	0.21	0.86
	GOTERM_BP_FAT	positive regulation of apoptosis	12	0.22	0.86
	GOTERM_BP_FAT	positive regulation of programmed cell death	12	0.23	0.86
	GOTERM_BP_FAT	positive regulation of cell death	12	0.23	0.87
	GOTERM_BP_FAT	induction of apoptosis	7	0.6	0.99
	GOTERM_BP_FAT	induction of programmed cell death	7	0.6	0.99
	GOTERM_BP_FAT	induction of apoptosis by extracellular signals	3	0.65	0.99
Annotation Cluster 16		Enrichment Score: 1.16	Count	P_Value	Benjamini
	GOTERM_BP_FAT	neuromuscular junction development	4	0.0066	0.27
	GOTERM_BP_FAT	skeletal muscle fiber development	4	0.017	0.39
	GOTERM_BP_FAT	striated muscle tissue development	7	0.029	0.47
	GOTERM_BP_FAT	muscle fiber development	4	0.03	0.47
	GOTERM_BP_FAT	muscle tissue development	7	0.036	0.49
	GOTERM_BP_FAT	striated muscle cell development	4	0.081	0.64
	GOTERM_BP_FAT	muscle cell differentiation	6	0.088	0.66
	GOTERM_BP_FAT	muscle cell development	4	0.096	0.67
	GOTERM_BP_FAT	synapse organization	4	0.12	0.72
	GOTERM_BP_FAT	muscle organ development	8	0.12	0.72
	GOTERM_BP_FAT	skeletal muscle tissue development	4	0.14	0.77
	GOTERM_BP_FAT	skeletal muscle organ development	4	0.14	0.77
	GOTERM_BP_FAT	striated muscle cell differentiation	4	0.25	0.87
	GOTERM_BP_FAT	extracellular structure organization	5	0.39	0.95
Annotation Cluster 17		Enrichment Score: 1.1	Count	P_Value	Benjamini
	GOTERM_BP_FAT	cell cycle checkpoint	7	0.0087	0.3
	GOTERM_BP_FAT	DNA damage response, signal transduction	5	0.071	0.63
	GOTERM_BP_FAT	DNA damage checkpoint	3	0.24	0.87
	GOTERM_BP_FAT	DNA integrity checkpoint	3	0.27	0.89
Annotation Cluster 18		Enrichment Score: 1.07	Count	P_Value	Benjamini
	GOTERM_BP_FAT	regulation of cellular protein metabolic process	18	0.012	0.34
	GOTERM_BP_FAT	regulation of protein modification process	13	0.013	0.36
	GOTERM_BP_FAT	negative regulation of cellular protein metabolic process	8	0.063	0.61
	GOTERM_BP_FAT	negative regulation of protein metabolic process	8	0.074	0.63
	GOTERM_BP_FAT	negative regulation of protein modification process	6	0.084	0.65
	GOTERM_BP_FAT	regulation of protein ubiquitination	5	0.13	0.75
	GOTERM_BP_FAT	positive regulation of cellular protein metabolic process	8	0.17	0.81
	GOTERM_BP_FAT	positive regulation of protein metabolic process	8	0.2	0.84
	GOTERM_BP_FAT	positive regulation of protein ubiquitination	4	0.23	0.86
	GOTERM_BP_FAT	positive regulation of protein modification process	6	0.3	0.91
Annotation Cluster 19		Enrichment Score: 1.07	Count	P_Value	Benjamini
	GOTERM_BP_FAT	regulation of DNA metabolic process	7	0.024	0.44
	GOTERM_BP_FAT	negative regulation of DNA replication	3	0.1	0.68
	GOTERM_BP_FAT	regulation of DNA replication	4	0.12	0.73
	GOTERM_BP_FAT	negative regulation of DNA metabolic process	3	0.18	0.82
Annotation Cluster 20		Enrichment Score: 1.05	Count	P_Value	Benjamini
	GOTERM_BP_FAT	cytoskeleton organization	15	0.047	0.57
	GOTERM_BP_FAT	actin filament-based process	9	0.1	0.68
	GOTERM_BP_FAT	actin cytoskeleton organization	8	0.15	0.79
Annotation Cluster 21	Count	Enrichment Score: 1.04
	GOTERM_BP_FAT	cellular response to hormone stimulus	9	0.0046	0.24
	GOTERM_BP_FAT	response to endogenous stimulus	14	0.054	0.58
	GOTERM_BP_FAT	response to hormone stimulus	13	0.056	0.59
	GOTERM_BP_FAT	response to organic substance	21	0.072	0.63
	GOTERM_BP_FAT	response to estradiol stimulus	4	0.088	0.66
	GOTERM_BP_FAT	response to estrogen stimulus	5	0.15	0.78
	GOTERM_BP_FAT	response to steroid hormone stimulus	7	0.17	0.81
	GOTERM_BP_FAT	response to peptide hormone stimulus	6	0.18	0.83
	GOTERM_BP_FAT	transmembrane receptor protein tyrosine kinase signaling pathway	7	0.27	0.89
	GOTERM_BP_FAT	response to ethanol	3	0.36	0.93
Annotation Cluster 22		Enrichment Score: 1.04	Count	P_Value	Benjamini
	GOTERM_BP_FAT	chromosome segregation	6	0.021	0.42
	GOTERM_BP_FAT	cell division	11	0.064	0.61
	GOTERM_BP_FAT	mitosis	9	0.067	0.62
	GOTERM_BP_FAT	nuclear division	9	0.067	0.62
	GOTERM_BP_FAT	M phase of mitotic cell cycle	9	0.073	0.63
	GOTERM_BP_FAT	organelle fission	9	0.08	0.64
	GOTERM_BP_FAT	cell cycle	22	0.08	0.64
	GOTERM_BP_FAT	cell cycle phase	12	0.19	0.83
	GOTERM_BP_FAT	mitotic cell cycle	11	0.19	0.83
	GOTERM_BP_FAT	M phase	10	0.19	0.84
	GOTERM_BP_FAT	cell cycle process	15	0.22	0.86
Annotation Cluster 23		Enrichment Score: 1.01	Count	P_Value	Benjamini
	GOTERM_BP_FAT	intracellular receptor-mediated signaling pathway	5	0.059	0.6
	GOTERM_BP_FAT	steroid hormone receptor signaling pathway	4	0.1	0.69
	GOTERM_BP_FAT	androgen receptor signaling pathway	3	0.16	0.79
Annotation Cluster 24		Enrichment Score: 0.9	Count	P_Value	Benjamini
	GOTERM_BP_FAT	nucleotide-excision repair, DNA damage removal	3	0.068	0.62
	GOTERM_BP_FAT	nucleotide-excision repair	4	0.092	0.66
	GOTERM_BP_FAT	DNA catabolic process	3	0.33	0.92
Annotation Cluster 25		Enrichment Score: 0.89	Count	P_Value	Benjamini
	GOTERM_BP_FAT	ubiquitin-dependent protein catabolic process	11	0.021	0.42
	GOTERM_BP_FAT	proteasomal protein catabolic process	4	0.32	0.92
	GOTERM_BP_FAT	proteasomal ubiquitin-dependent protein catabolic process	4	0.32	0.92
Annotation Cluster 26		Enrichment Score: 0.88	Count	P_Value	Benjamini
	GOTERM_BP_FAT	amino acid activation	4	0.06	0.6
	GOTERM_BP_FAT	tRNA aminoacylation	4	0.06	0.6
	GOTERM_BP_FAT	tRNA aminoacylation for protein translation	4	0.06	0.6
	GOTERM_BP_FAT	translation	10	0.2	0.84
	GOTERM_BP_FAT	ncRNA metabolic process	7	0.29	0.91
	GOTERM_BP_FAT	tRNA metabolic process	4	0.41	0.95
Annotation Cluster 27		Enrichment Score: 0.81	Count	P_Value	Benjamini
	GOTERM_BP_FAT	purine nucleotide catabolic process	4	0.026	0.45
	GOTERM_BP_FAT	purine nucleotide metabolic process	9	0.03	0.48
	GOTERM_BP_FAT	purine nucleoside triphosphate metabolic process	7	0.032	0.47
	GOTERM_BP_FAT	ATP catabolic process	3	0.038	0.51
	GOTERM_BP_FAT	nucleoside triphosphate metabolic process	7	0.043	0.54
	GOTERM_BP_FAT	purine ribonucleoside triphosphate catabolic process	3	0.052	0.59
	GOTERM_BP_FAT	ribonucleoside triphosphate catabolic process	3	0.052	0.59
	GOTERM_BP_FAT	ATP metabolic process	6	0.055	0.58
	GOTERM_BP_FAT	purine nucleoside triphosphate catabolic process	3	0.062	0.61
	GOTERM_BP_FAT	purine ribonucleotide catabolic process	3	0.073	0.63
	GOTERM_BP_FAT	nucleotide catabolic process	4	0.077	0.64
	GOTERM_BP_FAT	purine ribonucleoside triphosphate metabolic process	6	0.079	0.64
	GOTERM_BP_FAT	nucleoside triphosphate catabolic process	3	0.079	0.64
	GOTERM_BP_FAT	ribonucleoside triphosphate metabolic process	6	0.081	0.64
	GOTERM_BP_FAT	ribonucleotide catabolic process	3	0.085	0.65
	GOTERM_BP_FAT	nucleobase, nucleoside and nucleotide catabolic process	4	0.1	0.69
	GOTERM_BP_FAT	nucleobase, nucleoside, nucleotide and nucleic acid catabolic process	4	0.1	0.69
	GOTERM_BP_FAT	purine ribonucleotide metabolic process	6	0.13	0.76
	GOTERM_BP_FAT	nitrogen compound catabolic process	4	0.14	0.77
	GOTERM_BP_FAT	ribonucleotide metabolic process	6	0.16	0.8
	GOTERM_BP_FAT	heterocycle catabolic process	4	0.19	0.83
	GOTERM_BP_FAT	nitrogen compound biosynthetic process	8	0.44	0.96
	GOTERM_BP_FAT	ATP biosynthetic process	3	0.52	0.98
	GOTERM_BP_FAT	purine nucleotide biosynthetic process	4	0.55	0.98
	GOTERM_BP_FAT	purine ribonucleoside triphosphate biosynthetic process	3	0.57	0.99
	GOTERM_BP_FAT	ribonucleoside triphosphate biosynthetic process	3	0.58	0.99
	GOTERM_BP_FAT	purine nucleoside triphosphate biosynthetic process	3	0.58	0.99
	GOTERM_BP_FAT	nucleoside triphosphate biosynthetic process	3	0.6	0.99
	GOTERM_BP_FAT	purine ribonucleotide biosynthetic process	3	0.67	0.99
	GOTERM_BP_FAT	ribonucleotide biosynthetic process	3	0.7	1
	GOTERM_BP_FAT	nucleotide biosynthetic process	4	0.71	1
	GOTERM_BP_FAT	nucleobase, nucleoside, nucleotide and nucleic acid biosynthetic process	4	0.73	1
	GOTERM_BP_FAT	nucleobase, nucleoside and nucleotide biosynthetic process	4	0.73	1
Annotation Cluster 28		Enrichment Score: 0.79	Count	P_Value	Benjamini
	GOTERM_BP_FAT	centrosome organization	3	0.13	0.75
	GOTERM_BP_FAT	microtubule organizing center organization	3	0.15	0.78
	GOTERM_BP_FAT	microtubule cytoskeleton organization	6	0.16	0.8
	GOTERM_BP_FAT	microtubule-based process	8	0.23	0.86
Annotation Cluster 29		Enrichment Score: 0.78	Count	P_Value	Benjamini
	GOTERM_BP_FAT	regulation of cell cycle process	7	0.024	0.44
	GOTERM_BP_FAT	regulation of mitosis	3	0.3	0.91
	GOTERM_BP_FAT	regulation of nuclear division	3	0.3	0.91
	GOTERM_BP_FAT	regulation of mitotic cell cycle	5	0.35	0.93
Annotation Cluster 30		Enrichment Score: 0.77	Count	P_Value	Benjamini
	GOTERM_BP_FAT	protein amino acid phosphorylation	19	0.1	0.68
	GOTERM_BP_FAT	phosphate metabolic process	24	0.2	0.84
	GOTERM_BP_FAT	phosphorus metabolic process	24	0.2	0.84
	GOTERM_BP_FAT	phosphorylation	20	0.22	0.86
Annotation Cluster 31		Enrichment Score: 0.75	Count	P_Value	Benjamini
	GOTERM_BP_FAT	negative regulation of cell migration	4	0.1	0.68
	GOTERM_BP_FAT	negative regulation of locomotion	4	0.12	0.72
	GOTERM_BP_FAT	negative regulation of cell motion	4	0.12	0.74
	GOTERM_BP_FAT	regulation of cell motion	7	0.18	0.82
	GOTERM_BP_FAT	negative regulation of cell adhesion	3	0.2	0.85
	GOTERM_BP_FAT	regulation of cell migration	6	0.23	0.87
	GOTERM_BP_FAT	regulation of cell adhesion	5	0.28	0.9
	GOTERM_BP_FAT	regulation of locomotion	6	0.32	0.92
Annotation Cluster 32		Enrichment Score: 0.72	Count	P_Value	Benjamini
	GOTERM_BP_FAT	telomere maintenance	3	0.1	0.68
	GOTERM_BP_FAT	telomere organization	3	0.11	0.7
	GOTERM_BP_FAT	anatomical structure homeostasis	3	0.62	0.99
Annotation Cluster 33		Enrichment Score: 0.66	Count	P_Value	Benjamini
	GOTERM_BP_FAT	lipid localization	7	0.087	0.66
	GOTERM_BP_FAT	lipid transport	6	0.15	0.79
	GOTERM_BP_FAT	steroid metabolic process	4	0.76	1
Annotation Cluster 34		Enrichment Score: 0.66	Count	P_Value	Benjamini
	GOTERM_BP_FAT	chordate embryonic development	10	0.2	0.84
	GOTERM_BP_FAT	embryonic development ending in birth or egg hatching	10	0.21	0.85
	GOTERM_BP_FAT	in utero embryonic development	6	0.26	0.88
Annotation Cluster 35		Enrichment Score: 0.64	Count	P_Value	Benjamini
	GOTERM_BP_FAT	regulation of protein modification process	13	0.013	0.36
	GOTERM_BP_FAT	regulation of kinase activity	11	0.16	0.8
	GOTERM_BP_FAT	regulation of transferase activity	11	0.19	0.84
	GOTERM_BP_FAT	regulation of protein kinase activity	10	0.23	0.87
	GOTERM_BP_FAT	regulation of phosphate metabolic process	13	0.24	0.87
	GOTERM_BP_FAT	regulation of phosphorus metabolic process	13	0.24	0.87
	GOTERM_BP_FAT	negative regulation of protein kinase activity	4	0.24	0.87
	GOTERM_BP_FAT	negative regulation of kinase activity	4	0.26	0.88
	GOTERM_BP_FAT	negative regulation of transferase activity	4	0.29	0.91
	GOTERM_BP_FAT	regulation of phosphorylation	12	0.3	0.91
	GOTERM_BP_FAT	regulation of protein kinase cascade	7	0.36	0.94
	GOTERM_BP_FAT	regulation of protein amino acid phosphorylation	5	0.44	0.96
	GOTERM_BP_FAT	negative regulation of catalytic activity	7	0.45	0.97
	GOTERM_BP_FAT	negative regulation of molecular function	8	0.48	0.97
Annotation Cluster 36		Enrichment Score: 0.61	Count	P_Value	Benjamini
	GOTERM_BP_FAT	regulation of protein stability	6	0.0013	0.11
	GOTERM_BP_FAT	T cell differentiation in the thymus	3	0.097	0.67
	GOTERM_BP_FAT	T cell differentiation	4	0.13	0.75
	GOTERM_BP_FAT	immune system development	9	0.17	0.81
	GOTERM_BP_FAT	T cell activation	5	0.23	0.87
	GOTERM_BP_FAT	hemopoietic or lymphoid organ development	8	0.25	0.87
	GOTERM_BP_FAT	homeostasis of number of cells	4	0.31	0.91
	GOTERM_BP_FAT	hemopoiesis	7	0.32	0.92
	GOTERM_BP_FAT	lymphocyte differentiation	4	0.33	0.92
	GOTERM_BP_FAT	leukocyte differentiation	4	0.47	0.97
	GOTERM_BP_FAT	immune effector process	4	0.49	0.97
	GOTERM_BP_FAT	leukocyte activation	6	0.51	0.98
	GOTERM_BP_FAT	lymphocyte activation	5	0.55	0.98
	GOTERM_BP_FAT	cell activation	6	0.66	0.99
	GOTERM_BP_FAT	positive regulation of immune system process	4	0.85	1
	GOTERM_BP_FAT	immune response	5	1	1
Annotation Cluster 37		Enrichment Score: 0.61	Count	P_Value	Benjamini
	GOTERM_BP_FAT	regulation of cellular response to stress	6	0.051	0.58
	GOTERM_BP_FAT	regulation of MAPKKK cascade	4	0.36	0.94
	GOTERM_BP_FAT	regulation of protein kinase cascade	7	0.36	0.94
	GOTERM_BP_FAT	regulation of JNK cascade	3	0.36	0.94
	GOTERM_BP_FAT	regulation of stress-activated protein kinase signaling pathway	3	0.39	0.95
Annotation Cluster 38		Enrichment Score: 0.58	Count	P_Value	Benjamini
	GOTERM_BP_FAT	vasculogenesis	3	0.19	0.83
	GOTERM_BP_FAT	blood vessel development	8	0.2	0.85
	GOTERM_BP_FAT	vasculature development	8	0.22	0.86
	GOTERM_BP_FAT	blood vessel morphogenesis	7	0.23	0.87
	GOTERM_BP_FAT	cardiac muscle tissue development	3	0.31	0.91
	GOTERM_BP_FAT	angiogenesis	4	0.55	0.98
Annotation Cluster 39		Enrichment Score: 0.56	Count	P_Value	Benjamini
	GOTERM_BP_FAT	mitotic cell cycle	11	0.19	0.83
	GOTERM_BP_FAT	interphase of mitotic cell cycle	4	0.33	0.92
	GOTERM_BP_FAT	interphase	4	0.34	0.93
Annotation Cluster 40		Enrichment Score: 0.56	Count	P_Value	Benjamini
	GOTERM_BP_FAT	mesoderm formation	3	0.16	0.79
	GOTERM_BP_FAT	gastrulation	4	0.16	0.79
	GOTERM_BP_FAT	mesoderm morphogenesis	3	0.17	0.81
	GOTERM_BP_FAT	formation of primary germ layer	3	0.18	0.82
	GOTERM_BP_FAT	mesoderm development	3	0.43	0.96
	GOTERM_BP_FAT	embryonic morphogenesis	7	0.56	0.98
	GOTERM_BP_FAT	tissue morphogenesis	4	0.69	1
Annotation Cluster 41		Enrichment Score: 0.55	Count	P_Value	Benjamini
	GOTERM_BP_FAT	glycosylation	5	0.24	0.87
	GOTERM_BP_FAT	protein amino acid glycosylation	5	0.24	0.87
	GOTERM_BP_FAT	biopolymer glycosylation	5	0.24	0.87
	GOTERM_BP_FAT	glycoprotein metabolic process	6	0.36	0.94
	GOTERM_BP_FAT	glycoprotein biosynthetic process	5	0.37	0.94
Annotation Cluster 42		Enrichment Score: 0.5	Count	P_Value	Benjamini
	GOTERM_BP_FAT	RNA splicing	11	0.052	0.58
	GOTERM_BP_FAT	RNA splicing, via transesterification reactions	4	0.58	0.99
	GOTERM_BP_FAT	RNA splicing, via transesterification reactions with bulged adenosine as nucleophile	4	0.58	0.99
	GOTERM_BP_FAT	nuclear mRNA splicing, via spliceosome	4	0.58	0.99
Annotation Cluster 43		Enrichment Score: 0.49	Count	P_Value	Benjamini
	GOTERM_BP_FAT	regulation of binding	7	0.079	0.64
	GOTERM_BP_FAT	positive regulation of DNA binding	3	0.4	0.95
	GOTERM_BP_FAT	regulation of DNA binding	4	0.42	0.96
	GOTERM_BP_FAT	positive regulation of binding	3	0.45	0.97
	GOTERM_BP_FAT	regulation of transcription factor activity	3	0.6	0.99
Annotation Cluster 44		Enrichment Score: 0.46	Count	P_Value	Benjamini
	GOTERM_BP_FAT	cellular carbohydrate catabolic process	4	0.23	0.87
	GOTERM_BP_FAT	glycolysis	3	0.23	0.87
	GOTERM_BP_FAT	monosaccharide metabolic process	7	0.27	0.89
	GOTERM_BP_FAT	glucose catabolic process	3	0.31	0.92
	GOTERM_BP_FAT	hexose metabolic process	6	0.32	0.92
	GOTERM_BP_FAT	glucose metabolic process	5	0.35	0.93
	GOTERM_BP_FAT	carbohydrate catabolic process	4	0.36	0.94
	GOTERM_BP_FAT	hexose catabolic process	3	0.39	0.95
	GOTERM_BP_FAT	monosaccharide catabolic process	3	0.4	0.95
	GOTERM_BP_FAT	alcohol catabolic process	3	0.47	0.97
	GOTERM_BP_FAT	generation of precursor metabolites and energy	7	0.58	0.99
Annotation Cluster 45		Enrichment Score: 0.46	Count	P_Value	Benjamini
	GOTERM_BP_FAT	response to peptide hormone stimulus	6	0.18	0.83
	GOTERM_BP_FAT	cellular response to insulin stimulus	3	0.38	0.95
	GOTERM_BP_FAT	response to insulin stimulus	3	0.58	0.99
Annotation Cluster 46		Enrichment Score: 0.44	Count	P_Value	Benjamini
	GOTERM_BP_FAT	microtubule-based process	8	0.23	0.86
	GOTERM_BP_FAT	establishment of organelle localization	3	0.39	0.95
	GOTERM_BP_FAT	organelle localization	3	0.54	0.98
Annotation Cluster 47		Enrichment Score: 0.43	Count	P_Value	Benjamini
	GOTERM_BP_FAT	cell motion	13	0.22	0.86
	GOTERM_BP_FAT	cell migration	8	0.29	0.91
	GOTERM_BP_FAT	localization of cell	8	0.39	0.95
	GOTERM_BP_FAT	cell motility	8	0.39	0.95
	GOTERM_BP_FAT	membrane organization	7	0.76	1
Annotation Cluster 48		Enrichment Score: 0.4	Count	P_Value	Benjamini
	GOTERM_BP_FAT	negative regulation of protein kinase cascade	3	0.16	0.79
	GOTERM_BP_FAT	regulation of protein kinase cascade	7	0.36	0.94
	GOTERM_BP_FAT	negative regulation of signal transduction	5	0.63	0.99
	GOTERM_BP_FAT	negative regulation of cell communication	5	0.72	1
Annotation Cluster 49		Enrichment Score: 0.37	Count	P_Value	Benjamini
	GOTERM_BP_FAT	response to nutrient levels	6	0.34	0.93
	GOTERM_BP_FAT	response to extracellular stimulus	6	0.43	0.96
	GOTERM_BP_FAT	response to nutrient	4	0.52	0.98
Annotation Cluster 50		Enrichment Score: 0.36	Count	P_Value	Benjamini
	GOTERM_BP_FAT	carboxylic acid transport	5	0.32	0.92
	GOTERM_BP_FAT	organic acid transport	5	0.33	0.92
	GOTERM_BP_FAT	amino acid transport	3	0.53	0.98
	GOTERM_BP_FAT	amine transport	3	0.67	0.99
Annotation Cluster 51		Enrichment Score: 0.35	Count	P_Value	Benjamini
	GOTERM_BP_FAT	positive regulation of developmental process	8	0.3	0.91
	GOTERM_BP_FAT	positive regulation of cell development	3	0.39	0.95
	GOTERM_BP_FAT	positive regulation of cell differentiation	6	0.46	0.97
	GOTERM_BP_FAT	regulation of cell development	4	0.77	1
Annotation Cluster 52		Enrichment Score: 0.34	Count	P_Value	Benjamini
	GOTERM_BP_FAT	nucleosome organization	4	0.27	0.89
	GOTERM_BP_FAT	chromatin assembly or disassembly	4	0.45	0.97
	GOTERM_BP_FAT	chromatin assembly	3	0.51	0.98
	GOTERM_BP_FAT	DNA packaging	3	0.67	0.99
Annotation Cluster 53		Enrichment Score: 0.34	Count	P_Value	Benjamini
	GOTERM_BP_FAT	anterior/posterior pattern formation	5	0.29	0.91
	GOTERM_BP_FAT	regionalization	5	0.54	0.98
	GOTERM_BP_FAT	pattern specification process	6	0.6	0.99
Annotation Cluster 54		Enrichment Score: 0.33	Count	P_Value	Benjamini
	GOTERM_BP_FAT	response to calcium ion	3	0.29	0.91
	GOTERM_BP_FAT	response to metal ion	4	0.46	0.97
	GOTERM_BP_FAT	response to inorganic substance	4	0.77	1
Annotation Cluster 55		Enrichment Score: 0.31	Count	P_Value	Benjamini
	GOTERM_BP_FAT	regulation of kinase activity	11	0.16	0.8
	GOTERM_BP_FAT	regulation of transferase activity	11	0.19	0.84
	GOTERM_BP_FAT	regulation of protein kinase activity	10	0.23	0.87
	GOTERM_BP_FAT	positive regulation of molecular function	10	0.81	1
	GOTERM_BP_FAT	positive regulation of protein kinase activity	4	0.81	1
	GOTERM_BP_FAT	positive regulation of kinase activity	4	0.83	1
	GOTERM_BP_FAT	positive regulation of transferase activity	4	0.85	1
	GOTERM_BP_FAT	positive regulation of catalytic activity	8	0.89	1
Annotation Cluster 56		Enrichment Score: 0.26	Count	P_Value	Benjamini
	GOTERM_BP_FAT	regulation of cell size	6	0.37	0.94
	GOTERM_BP_FAT	regulation of growth	8	0.5	0.98
	GOTERM_BP_FAT	negative regulation of cell growth	3	0.54	0.98
	GOTERM_BP_FAT	negative regulation of cell size	3	0.58	0.99
	GOTERM_BP_FAT	negative regulation of growth	3	0.64	0.99
	GOTERM_BP_FAT	regulation of cell growth	4	0.73	1
Annotation Cluster 57		Enrichment Score: 0.25	Count	P_Value	Benjamini
	GOTERM_BP_FAT	transcription, DNA-dependent	7	0.51	0.98
	GOTERM_BP_FAT	RNA biosynthetic process	7	0.52	0.98
	GOTERM_BP_FAT	transcription from RNA polymerase II promoter	5	0.67	0.99
Annotation Cluster 58		Enrichment Score: 0.24	Count	P_Value	Benjamini
	GOTERM_BP_FAT	regulation of gene-specific transcription	4	0.49	0.97
	GOTERM_BP_FAT	positive regulation of gene-specific transcription	3	0.51	0.98
	GOTERM_BP_FAT	cell fate commitment	3	0.76	1
Annotation Cluster 59		Enrichment Score: 0.23	Count	P_Value	Benjamini
	GOTERM_BP_FAT	response to lipopolysaccharide	3	0.45	0.97
	GOTERM_BP_FAT	response to molecule of bacterial origin	3	0.5	0.98
	GOTERM_BP_FAT	response to bacterium	3	0.89	1
Annotation Cluster 60		Enrichment Score: 0.22	Count	P_Value	Benjamini
	GOTERM_BP_FAT	T cell activation	5	0.23	0.87
	GOTERM_BP_FAT	positive regulation of T cell activation	3	0.44	0.96
	GOTERM_BP_FAT	leukocyte activation	6	0.51	0.98
	GOTERM_BP_FAT	lymphocyte activation	5	0.55	0.98
	GOTERM_BP_FAT	positive regulation of lymphocyte activation	3	0.57	0.99
	GOTERM_BP_FAT	positive regulation of leukocyte activation	3	0.62	0.99
	GOTERM_BP_FAT	positive regulation of cell activation	3	0.64	0.99
	GOTERM_BP_FAT	cell activation	6	0.66	0.99
	GOTERM_BP_FAT	regulation of T cell activation	3	0.67	0.99
	GOTERM_BP_FAT	regulation of lymphocyte activation	3	0.79	1
	GOTERM_BP_FAT	regulation of leukocyte activation	3	0.84	1
	GOTERM_BP_FAT	positive regulation of immune system process	4	0.85	1
	GOTERM_BP_FAT	regulation of cell activation	3	0.86	1
Annotation Cluster 61		Enrichment Score: 0.21	Count	P_Value	Benjamini
	GOTERM_BP_FAT	cell projection organization	11	0.18	0.82
	GOTERM_BP_FAT	neuron projection development	7	0.38	0.95
	GOTERM_BP_FAT	neuron projection morphogenesis	5	0.6	0.99
	GOTERM_BP_FAT	neuron differentiation	9	0.63	0.99
	GOTERM_BP_FAT	neuron development	7	0.65	0.99
	GOTERM_BP_FAT	cell projection morphogenesis	5	0.71	1
	GOTERM_BP_FAT	axonogenesis	4	0.73	1
	GOTERM_BP_FAT	cell part morphogenesis	5	0.74	1
	GOTERM_BP_FAT	cell morphogenesis involved in neuron differentiation	4	0.78	1
	GOTERM_BP_FAT	cellular component morphogenesis	7	0.79	1
	GOTERM_BP_FAT	cell morphogenesis	6	0.83	1
	GOTERM_BP_FAT	cell morphogenesis involved in differentiation	4	0.86	1
Annotation Cluster 62		Enrichment Score: 0.19	Count	P_Value	Benjamini
	GOTERM_BP_FAT	lung development	3	0.58	0.99
	GOTERM_BP_FAT	respiratory tube development	3	0.6	0.99
	GOTERM_BP_FAT	respiratory system development	3	0.63	0.99
	GOTERM_BP_FAT	tube development	4	0.81	1
Annotation Cluster 63		Enrichment Score: 0.17	Count	P_Value	Benjamini
	GOTERM_BP_FAT	homeostatic process	22	0.062	0.61
	GOTERM_BP_FAT	calcium ion transport	5	0.3	0.91
	GOTERM_BP_FAT	chemical homeostasis	12	0.42	0.96
	GOTERM_BP_FAT	di-, tri-valent inorganic cation transport	5	0.45	0.97
	GOTERM_BP_FAT	cellular homeostasis	9	0.69	1
	GOTERM_BP_FAT	regulation of membrane potential	3	0.74	1
	GOTERM_BP_FAT	ion homeostasis	7	0.81	1
	GOTERM_BP_FAT	cellular ion homeostasis	6	0.86	1
	GOTERM_BP_FAT	cellular chemical homeostasis	6	0.87	1
	GOTERM_BP_FAT	cellular calcium ion homeostasis	3	0.88	1
	GOTERM_BP_FAT	calcium ion homeostasis	3	0.89	1
	GOTERM_BP_FAT	metal ion transport	7	0.9	1
	GOTERM_BP_FAT	cellular metal ion homeostasis	3	0.9	1
	GOTERM_BP_FAT	metal ion homeostasis	3	0.91	1
	GOTERM_BP_FAT	cellular di-, tri-valent inorganic cation homeostasis	3	0.94	1
	GOTERM_BP_FAT	di-, tri-valent inorganic cation homeostasis	3	0.95	1
	GOTERM_BP_FAT	cellular cation homeostasis	3	0.96	1
	GOTERM_BP_FAT	cation transport	7	0.96	1
	GOTERM_BP_FAT	ion transport	10	0.97	1
	GOTERM_BP_FAT	cation homeostasis	3	0.98	1
Annotation Cluster 64		Enrichment Score: 0.16	Count	P_Value	Benjamini
	GOTERM_BP_FAT	positive regulation of response to stimulus	6	0.5	0.98
	GOTERM_BP_FAT	positive regulation of immune response	3	0.78	1
	GOTERM_BP_FAT	positive regulation of immune system process	4	0.85	1
Annotation Cluster 65		Enrichment Score: 0.12	Count	P_Value	Benjamini
	GOTERM_BP_FAT	exocytosis	3	0.66	0.99
	GOTERM_BP_FAT	secretion by cell	4	0.77	1
	GOTERM_BP_FAT	secretion	5	0.84	1
Annotation Cluster 66		Enrichment Score: 0.12	Count	P_Value	Benjamini
	GOTERM_BP_FAT	glycerolipid metabolic process	4	0.62	0.99
	GOTERM_BP_FAT	glycerophospholipid metabolic process	3	0.67	0.99
	GOTERM_BP_FAT	phospholipid metabolic process	3	0.89	1
	GOTERM_BP_FAT	organophosphate metabolic process	3	0.9	1
Annotation Cluster 67		Enrichment Score: 0.12	Count	P_Value	Benjamini
	GOTERM_BP_FAT	positive regulation of secretion	3	0.63	0.99
	GOTERM_BP_FAT	regulation of secretion	4	0.76	1
	GOTERM_BP_FAT	positive regulation of transport	4	0.81	1
	GOTERM_BP_FAT	regulation of cellular localization	4	0.87	1
Annotation Cluster 68		Enrichment Score: 0.1	Count	P_Value	Benjamini
	GOTERM_BP_FAT	membrane organization	7	0.76	1
	GOTERM_BP_FAT	membrane invagination	4	0.81	1
	GOTERM_BP_FAT	endocytosis	4	0.81	1
Annotation Cluster 69		Enrichment Score: 0.06	Count	P_Value	Benjamini
	GOTERM_BP_FAT	acute inflammatory response	3	0.57	0.99
	GOTERM_BP_FAT	response to wounding	6	0.98	1
	GOTERM_BP_FAT	inflammatory response	3	0.99	1
	GOTERM_BP_FAT	defense response	5	1	1
Annotation Cluster 70		Enrichment Score: 0.05	Count	P_Value	Benjamini
	GOTERM_BP_FAT	sexual reproduction	8	0.79	1
	GOTERM_BP_FAT	gamete generation	6	0.89	1
	GOTERM_BP_FAT	reproductive developmental process	4	0.89	1
	GOTERM_BP_FAT	multicellular organism reproduction	7	0.92	1
	GOTERM_BP_FAT	reproductive process in a multicellular organism	7	0.92	1
	GOTERM_BP_FAT	male gamete generation	4	0.94	1
	GOTERM_BP_FAT	spermatogenesis	4	0.94	1
Annotation Cluster 71		Enrichment Score: 0.04	Count	P_Value	Benjamini
	GOTERM_BP_FAT	visual perception	4	0.8	1
	GOTERM_BP_FAT	sensory perception of light stimulus	4	0.8	1
	GOTERM_BP_FAT	sensory perception	6	1	1
	GOTERM_BP_FAT	cognition	7	1	1
	GOTERM_BP_FAT	neurological system process	9	1	1
were not clustered.

## Sheet: 1+4
1+4
CLUSTER MEDIUM
35 Cluster(s)
Annotation Cluster 1		Enrichment Score: 2.99	Count	P_Value	Benjamini
	GOTERM_BP_FAT	modification-dependent protein catabolic process	18	0.00031	0.31
	GOTERM_BP_FAT	modification-dependent macromolecule catabolic process	18	0.00031	0.31
	GOTERM_BP_FAT	proteolysis involved in cellular protein catabolic process	18	0.00052	0.19
	GOTERM_BP_FAT	cellular protein catabolic process	18	0.00055	0.15
	GOTERM_BP_FAT	cellular macromolecule catabolic process
	GOTERM_BP_FAT	protein catabolic process	18	0.00078	0.14
	GOTERM_BP_FAT	macromolecule catabolic process	20	0.0015	0.2
	GOTERM_BP_FAT	ubiquitin-dependent protein catabolic process	9	0.0068	0.49
	GOTERM_BP_FAT	proteolysis	22	0.009	0.56
Annotation Cluster 2		Enrichment Score: 2.19	Count	P_Value	Benjamini
	GOTERM_BP_FAT	mRNA metabolic process	14	0.00033	0.18
	GOTERM_BP_FAT	mRNA processing	12	0.0012	0.18
	GOTERM_BP_FAT	RNA splicing	11	0.0016	0.19
	GOTERM_BP_FAT	RNA processing	13	0.023	0.72
	GOTERM_BP_FAT	RNA splicing, via transesterification reactions	6	0.031	0.72
	GOTERM_BP_FAT	RNA splicing, via transesterification reactions with bulged adenosine as nucleophile	6	0.031	0.72
	GOTERM_BP_FAT	nuclear mRNA splicing, via spliceosome	6	0.031	0.72
Annotation Cluster 3		Enrichment Score: 1.52	Count	P_Value	Benjamini
	GOTERM_BP_FAT	regulation of mRNA stability	3	0.026	0.73
	GOTERM_BP_FAT	regulation of RNA stability	3	0.031	0.73
	GOTERM_BP_FAT	posttranscriptional regulation of gene expression	7	0.035	0.73
Annotation Cluster 4		Enrichment Score: 1.35	Count	P_Value	Benjamini
	GOTERM_BP_FAT	protein polyubiquitination	3	0.035	0.73
	GOTERM_BP_FAT	protein modification by small protein conjugation or removal	6	0.037	0.73
	GOTERM_BP_FAT	protein ubiquitination	5	0.048	0.78
	GOTERM_BP_FAT	protein modification by small protein conjugation	5	0.065	0.82
Annotation Cluster 5		Enrichment Score: 1.19	Count	P_Value	Benjamini
	GOTERM_BP_FAT	phosphorus metabolic process	20	0.016	0.69
	GOTERM_BP_FAT	phosphate metabolic process	20	0.016	0.69
	GOTERM_BP_FAT	phosphorylation	14	0.13	0.92
	GOTERM_BP_FAT	MAPKKK cascade	5	0.16	0.95
	GOTERM_BP_FAT	protein amino acid phosphorylation	11	0.24	0.97
Annotation Cluster 6		Enrichment Score: 0.96	Count	P_Value	Benjamini
	GOTERM_BP_FAT	protein targeting	8	0.012	0.61
	GOTERM_BP_FAT	protein import into nucleus, docking	3	0.016	0.67
	GOTERM_BP_FAT	intracellular transport	15	0.019	0.71
	GOTERM_BP_FAT	protein localization in organelle	6	0.026	0.7
	GOTERM_BP_FAT	intracellular protein transport	10	0.028	0.72
	GOTERM_BP_FAT	cellular protein localization	10	0.047	0.78
	GOTERM_BP_FAT	cellular macromolecule localization	10	0.049	0.77
	GOTERM_BP_FAT	protein import into nucleus	4	0.076	0.84
	GOTERM_BP_FAT	nuclear import	4	0.08	0.85
	GOTERM_BP_FAT	protein localization in nucleus	4	0.093	0.88
	GOTERM_BP_FAT	nucleocytoplasmic transport	5	0.1	0.89
	GOTERM_BP_FAT	nuclear transport	5	0.11	0.89
	GOTERM_BP_FAT	nuclear export	3	0.15	0.94
	GOTERM_BP_FAT	protein transport	13	0.16	0.94
	GOTERM_BP_FAT	establishment of protein localization	13	0.17	0.95
	GOTERM_BP_FAT	protein import	4	0.19	0.96
	GOTERM_BP_FAT	protein localization	14	0.21	0.96
	GOTERM_BP_FAT	macromolecular complex subunit organization	11	0.3	0.98
	GOTERM_BP_FAT	macromolecular complex assembly	10	0.35	0.98
	GOTERM_BP_FAT	protein complex assembly	8	0.36	0.98
	GOTERM_BP_FAT	protein complex biogenesis	8	0.36	0.98
	GOTERM_BP_FAT	cellular macromolecular complex subunit organization	6	0.39	0.99
	GOTERM_BP_FAT	cellular macromolecular complex assembly	5	0.5	0.99
	GOTERM_BP_FAT	cellular protein complex assembly	3	0.56	1
Annotation Cluster 7		Enrichment Score: 0.91	Benjamini
	GOTERM_BP_FAT	mitotic cell cycle	11	0.01	0.58
	GOTERM_BP_FAT	cell cycle phase	11	0.021	0.7
	GOTERM_BP_FAT	G1/S transition of mitotic cell cycle	4	0.026	0.72
	GOTERM_BP_FAT	interphase of mitotic cell cycle	5	0.031	0.72
	GOTERM_BP_FAT	interphase	5	0.034	0.73
	GOTERM_BP_FAT	cell cycle process	12	0.06	0.81
	GOTERM_BP_FAT	cell cycle	15	0.062	0.81
	GOTERM_BP_FAT	M phase	7	0.18	0.95
	GOTERM_BP_FAT	cell division	5	0.44	0.99
	GOTERM_BP_FAT	nuclear division	4	0.46	0.99
	GOTERM_BP_FAT	mitosis	4	0.46	0.99
	GOTERM_BP_FAT	M phase of mitotic cell cycle	4	0.48	0.99
	GOTERM_BP_FAT	organelle fission	4	0.49	0.99
	GOTERM_BP_FAT	regulation of cell cycle
	GOTERM_BP_FAT	regulation of cell proliferation	10	0.55	1
Annotation Cluster 8		Enrichment Score: 0.89	Count	P_Value	Benjamini
	GOTERM_BP_FAT	posttranscriptional regulation of gene expression	7	0.035	0.73
	GOTERM_BP_FAT	regulation of translation	4	0.21	0.96
	GOTERM_BP_FAT	regulation of cellular protein metabolic process	8	0.3	0.98
Annotation Cluster 9		Enrichment Score: 0.86	Count	P_Value	Benjamini
	GOTERM_BP_FAT	regulation of catabolic process	5	0.024	0.72
	GOTERM_BP_FAT	regulation of cellular catabolic process	3	0.15	0.94
	GOTERM_BP_FAT	positive regulation of cell proliferation	5	0.7	1
Annotation Cluster 10		Enrichment Score: 0.85	Count	P_Value	Benjamini
	GOTERM_BP_FAT	positive regulation of protein kinase activity	7	0.043	0.78
	GOTERM_BP_FAT	regulation of protein kinase activity	9	0.045	0.77
	GOTERM_BP_FAT	positive regulation of kinase activity	7	0.05	0.77
	GOTERM_BP_FAT	regulation of kinase activity	9	0.053	0.79
	GOTERM_BP_FAT	positive regulation of transferase activity	7	0.058	0.81
	GOTERM_BP_FAT	regulation of transferase activity	9	0.064	0.82
	GOTERM_BP_FAT	regulation of phosphorus metabolic process	10	0.11	0.89
	GOTERM_BP_FAT	regulation of phosphate metabolic process	10	0.11	0.89
	GOTERM_BP_FAT	JNK cascade	3	0.15	0.94
	GOTERM_BP_FAT	MAPKKK cascade	5	0.16	0.95
	GOTERM_BP_FAT	stress-activated protein kinase signaling pathway	3	0.16	0.95
	GOTERM_BP_FAT	regulation of phosphorylation	9	0.17	0.94
	GOTERM_BP_FAT	positive regulation of molecular function	10	0.23	0.97
	GOTERM_BP_FAT	activation of MAPK activity
	GOTERM_BP_FAT	positive regulation of catalytic activity	9	0.25	0.97
	GOTERM_BP_FAT	protein kinase cascade	7	0.25	0.97
	GOTERM_BP_FAT	positive regulation of MAP kinase activity	3	0.33	0.98
	GOTERM_BP_FAT	intracellular signaling cascade	17	0.37	0.98
	GOTERM_BP_FAT	activation of protein kinase activity	3	0.38	0.98
	GOTERM_BP_FAT	regulation of MAP kinase activity	3	0.48	0.99
Annotation Cluster 11		Enrichment Score: 0.82	Count	P_Value	Benjamini
	GOTERM_BP_FAT	protein amino acid methylation	3	0.073	0.83
	GOTERM_BP_FAT	protein amino acid alkylation	3	0.073	0.83
	GOTERM_BP_FAT	biopolymer methylation	3	0.19	0.96
	GOTERM_BP_FAT	methylation	3	0.22	0.96
	GOTERM_BP_FAT	one-carbon metabolic process	3	0.37	0.98
Annotation Cluster 12		Enrichment Score: 0.71	Count	P_Value	Benjamini
	GOTERM_BP_FAT	energy derivation by oxidation of organic compounds	5	0.084	0.85
	GOTERM_BP_FAT	generation of precursor metabolites and energy	6	0.29	0.98
	GOTERM_BP_FAT	cellular respiration	3	0.31	0.98
Annotation Cluster 13		Enrichment Score: 0.7	Count	P_Value	Benjamini
	GOTERM_BP_FAT	regulation of cell migration	6	0.045	0.78
	GOTERM_BP_FAT	regulation of locomotion	6	0.07	0.83
	GOTERM_BP_FAT	regulation of cell motion	6	0.071	0.83
	GOTERM_BP_FAT	positive regulation of cell migration	3	0.27	0.97
	GOTERM_BP_FAT	positive regulation of locomotion	3	0.31	0.98
	GOTERM_BP_FAT	positive regulation of cell motion
	GOTERM_BP_FAT	cell morphogenesis	5	0.59	1
	GOTERM_BP_FAT	cellular component morphogenesis	5	0.67	1
Annotation Cluster 14		Enrichment Score: 0.63	Count	P_Value	Benjamini
	GOTERM_BP_FAT	nucleocytoplasmic transport	5	0.1	0.89
	GOTERM_BP_FAT	nuclear transport	5	0.11	0.89
	GOTERM_BP_FAT	mRNA transport
	GOTERM_BP_FAT	nucleic acid transport	3	0.31	0.98
	GOTERM_BP_FAT	RNA transport	3	0.31	0.98
	GOTERM_BP_FAT	establishment of RNA localization	3	0.31	0.98
	GOTERM_BP_FAT	RNA localization	3	0.32	0.98
	GOTERM_BP_FAT	nucleobase, nucleoside, nucleotide and nucleic acid transport	3	0.37	0.98
Annotation Cluster 15		Enrichment Score: 0.54	Count	P_Value	Benjamini
	GOTERM_BP_FAT	apoptosis	10	0.25	0.97
	GOTERM_BP_FAT	programmed cell death	10	0.27	0.97
	GOTERM_BP_FAT	cell death	11	0.31	0.98
	GOTERM_BP_FAT	death	11	0.32	0.98
Annotation Cluster 16		Enrichment Score: 0.54	Benjamini
	GOTERM_BP_FAT	monosaccharide metabolic process	5	0.25	0.97
	GOTERM_BP_FAT	glucose metabolic process	4	0.26	0.97
	GOTERM_BP_FAT	hexose metabolic process	4	0.38	0.98
Annotation Cluster 17		Enrichment Score: 0.52	Count	P_Value	Benjamini
	GOTERM_BP_FAT	regulation of transcription from RNA polymerase II promoter	13	0.13	0.91
	GOTERM_BP_FAT	negative regulation of cellular biosynthetic process	10	0.19	0.96
	GOTERM_BP_FAT	negative regulation of biosynthetic process	10	0.21	0.96
	GOTERM_BP_FAT	negative regulation of transcription	8	0.27	0.97
	GOTERM_BP_FAT	negative regulation of macromolecule biosynthetic process	9	0.29	0.98
	GOTERM_BP_FAT	negative regulation of gene expression	8	0.36	0.98
	GOTERM_BP_FAT	negative regulation of transcription from RNA polymerase II promoter	5	0.36	0.98
	GOTERM_BP_FAT	negative regulation of nucleobase, nucleoside, nucleotide and nucleic acid metabolic process	8	0.37	0.98
	GOTERM_BP_FAT	negative regulation of nitrogen compound metabolic process	8	0.38	0.99
	GOTERM_BP_FAT	negative regulation of transcription, DNA-dependent	6	0.39	0.99
	GOTERM_BP_FAT	negative regulation of RNA metabolic process	6	0.4	0.99
	GOTERM_BP_FAT	negative regulation of macromolecule metabolic process	10	0.47	0.99
Annotation Cluster 18		Enrichment Score: 0.47	Count	P_Value	Benjamini
	GOTERM_BP_FAT	glycoprotein metabolic process	5	0.2	0.96
	GOTERM_BP_FAT	glycoprotein biosynthetic process	4	0.27	0.97
	GOTERM_BP_FAT	glycosylation	3	0.43	0.99
	GOTERM_BP_FAT	protein amino acid glycosylation	3	0.43	0.99
	GOTERM_BP_FAT	biopolymer glycosylation	3	0.43	0.99
Annotation Cluster 19		Enrichment Score: 0.44	Count	P_Value	Benjamini
	GOTERM_BP_FAT	transcription from RNA polymerase II promoter	9	0.0056	0.45
	GOTERM_BP_FAT	transcription, DNA-dependent	9	0.019	0.7
	GOTERM_BP_FAT	RNA biosynthetic process	9	0.021	0.71
	GOTERM_BP_FAT	regulation of transcription from RNA polymerase II promoter	13	0.13	0.91
	GOTERM_BP_FAT	positive regulation of transcription from RNA polymerase II promoter	6	0.42	0.99
	GOTERM_BP_FAT	positive regulation of RNA metabolic process	7	0.48	0.99
	GOTERM_BP_FAT	regulation of RNA metabolic process	21	0.61	1
	GOTERM_BP_FAT	positive regulation of developmental process	4	0.62	1
	GOTERM_BP_FAT	positive regulation of transcription, DNA-dependent
	GOTERM_BP_FAT	positive regulation of biosynthetic process	8	0.69	1
	GOTERM_BP_FAT	positive regulation of nucleobase, nucleoside, nucleotide and nucleic acid metabolic process	7	0.73	1
	GOTERM_BP_FAT	positive regulation of cell differentiation	3	0.74	1
	GOTERM_BP_FAT	regulation of transcription, DNA-dependent	19	0.74	1
	GOTERM_BP_FAT	positive regulation of nitrogen compound metabolic process	7	0.75	1
	GOTERM_BP_FAT	positive regulation of macromolecule metabolic process	9	0.77	1
	GOTERM_BP_FAT	positive regulation of transcription	6	0.78	1
	GOTERM_BP_FAT	positive regulation of gene expression	6	0.8	1
	GOTERM_BP_FAT	positive regulation of cellular biosynthetic process	7	0.8	1
	GOTERM_BP_FAT	regulation of transcription	27	0.81	1
	GOTERM_BP_FAT	positive regulation of macromolecule biosynthetic process	6	0.88	1
	GOTERM_BP_FAT	transcription	20	0.9	1
Annotation Cluster 20		Enrichment Score: 0.44	Count	P_Value	Benjamini
	GOTERM_BP_FAT	carboxylic acid biosynthetic process	4	0.26	0.97
	GOTERM_BP_FAT	organic acid biosynthetic process	4	0.26	0.97
	GOTERM_BP_FAT	lipid biosynthetic process	4	0.72	1
Annotation Cluster 21		Enrichment Score: 0.41	Benjamini
	GOTERM_BP_FAT	acute inflammatory response	3	0.31	0.98
	GOTERM_BP_FAT	inflammatory response	6	0.32	0.98
	GOTERM_BP_FAT	defense response	9	0.41	0.99
	GOTERM_BP_FAT	response to wounding	7	0.57	1
Annotation Cluster 22		Enrichment Score: 0.39	Count	P_Value	Benjamini
	GOTERM_BP_FAT	amino acid transport	3	0.28	0.97
	GOTERM_BP_FAT	amine transport	3	0.39	0.99
	GOTERM_BP_FAT	carboxylic acid transport	3	0.5	0.99
	GOTERM_BP_FAT	organic acid transport	3	0.51	0.99
Annotation Cluster 23		Enrichment Score: 0.38	Count	P_Value	Benjamini
	GOTERM_BP_FAT	ribonucleotide metabolic process	4	0.24	0.97
	GOTERM_BP_FAT	purine ribonucleotide metabolic process	3	0.47	0.99
	GOTERM_BP_FAT	purine nucleotide metabolic process	3	0.63	1
Annotation Cluster 24		Enrichment Score: 0.35	Count	P_Value	Benjamini
	GOTERM_BP_FAT	response to vitamin	3	0.17	0.95
	GOTERM_BP_FAT	response to nutrient	3	0.48	0.99
	GOTERM_BP_FAT	response to nutrient levels	3	0.66	1
	GOTERM_BP_FAT	response to extracellular stimulus	3	0.72	1
Annotation Cluster 25		Enrichment Score: 0.35	Count	P_Value	Benjamini
	GOTERM_BP_FAT	response to hormone stimulus	6	0.41	0.99
	GOTERM_BP_FAT	response to organic substance	10	0.44	0.99
	GOTERM_BP_FAT	response to endogenous stimulus	6	0.5	0.99
Annotation Cluster 26		Enrichment Score: 0.32	Count	P_Value	Benjamini
	GOTERM_BP_FAT	homeostatic process	12	0.24	0.97
	GOTERM_BP_FAT	cellular homeostasis	8	0.29	0.98
	GOTERM_BP_FAT	chemical homeostasis	8	0.37	0.98
	GOTERM_BP_FAT	ion homeostasis	6	0.51	0.99
	GOTERM_BP_FAT	cellular ion homeostasis	5	0.62	1
	GOTERM_BP_FAT	cellular chemical homeostasis	5	0.64	1
	GOTERM_BP_FAT	cation homeostasis	4	0.64	1
	GOTERM_BP_FAT	cellular cation homeostasis	3	0.79	1
Annotation Cluster 27		Enrichment Score: 0.3	Count	P_Value	Benjamini
	GOTERM_BP_FAT	angiogenesis	4	0.24	0.97
	GOTERM_BP_FAT	blood vessel development	5	0.31	0.98
	GOTERM_BP_FAT	vasculature development	5	0.32	0.98
	GOTERM_BP_FAT	blood vessel morphogenesis	4	0.44	0.99
	GOTERM_BP_FAT	cell motion	6	0.64	1
	GOTERM_BP_FAT	cell migration	3	0.83	1
	GOTERM_BP_FAT	cell motility	3	0.87	1
	GOTERM_BP_FAT	localization of cell	3	0.87	1
Annotation Cluster 28		Enrichment Score: 0.29	Count	P_Value	Benjamini
	GOTERM_BP_FAT	ribonucleotide metabolic process	4	0.24	0.97
	GOTERM_BP_FAT	ribonucleotide biosynthetic process	3	0.42	0.99
	GOTERM_BP_FAT	nucleotide biosynthetic process	3	0.63	1
	GOTERM_BP_FAT	nucleobase, nucleoside and nucleotide biosynthetic process	3	0.65	1
	GOTERM_BP_FAT	nucleobase, nucleoside, nucleotide and nucleic acid biosynthetic process	3	0.65	1
	GOTERM_BP_FAT	nitrogen compound biosynthetic process	4	0.72	1
Annotation Cluster 29		Enrichment Score: 0.26	Count	P_Value	Benjamini
	GOTERM_BP_FAT	cellular response to stress	9	0.32	0.98
	GOTERM_BP_FAT	response to DNA damage stimulus	5	0.62	1
	GOTERM_BP_FAT	DNA repair	4	0.64	1
	GOTERM_BP_FAT	DNA metabolic process	6	0.69	1
Annotation Cluster 30		Enrichment Score: 0.24	Count	P_Value	Benjamini
	GOTERM_BP_FAT	chromosome organization
	GOTERM_BP_FAT	chromatin modification	4	0.61	1
	GOTERM_BP_FAT	chromatin organization	5	0.63	1
Annotation Cluster 31		Enrichment Score: 0.2	Count	P_Value	Benjamini
	GOTERM_BP_FAT	chemotaxis	3	0.55	1
	GOTERM_BP_FAT	taxis	3	0.55	1
	GOTERM_BP_FAT	behavior	6	0.63	1
	GOTERM_BP_FAT	locomotory behavior	3	0.83	1
Annotation Cluster 32		Enrichment Score: 0.17	Count	P_Value	Benjamini
	GOTERM_BP_FAT	induction of apoptosis by extracellular signals	3	0.37	0.98
	GOTERM_BP_FAT	positive regulation of apoptosis	6	0.55	1
	GOTERM_BP_FAT	positive regulation of programmed cell death	6	0.56	1
	GOTERM_BP_FAT	positive regulation of cell death	6	0.56	1
	GOTERM_BP_FAT	induction of apoptosis	4	0.71	1
	GOTERM_BP_FAT	induction of programmed cell death	4	0.72	1
	GOTERM_BP_FAT	regulation of apoptosis	6	0.96	1
	GOTERM_BP_FAT	regulation of programmed cell death	6	0.96	1
	GOTERM_BP_FAT	regulation of cell death	6	0.96	1
Annotation Cluster 33		Enrichment Score: 0.14	Count	P_Value	Benjamini
	GOTERM_BP_FAT	vesicle-mediated transport	7	0.65	1
	GOTERM_BP_FAT	membrane invagination	3	0.72	1
	GOTERM_BP_FAT	endocytosis	3	0.72	1
	GOTERM_BP_FAT	membrane organization	4	0.82	1
Annotation Cluster 34		Enrichment Score: 0.14	Count	P_Value	Benjamini
	GOTERM_BP_FAT	cell morphogenesis	5	0.59	1
	GOTERM_BP_FAT	cell motion	6	0.64	1
	GOTERM_BP_FAT	cellular component morphogenesis	5	0.67	1
	GOTERM_BP_FAT	cell morphogenesis involved in differentiation	3	0.77	1
	GOTERM_BP_FAT	cell projection morphogenesis	3	0.77	1
	GOTERM_BP_FAT	cell part morphogenesis	3	0.8	1
	GOTERM_BP_FAT	cell projection organization	3	0.93	1
Annotation Cluster 35		Enrichment Score: 0.1	Count	P_Value	Benjamini
	GOTERM_BP_FAT	cation transport	6	0.76	1
	GOTERM_BP_FAT	ion transport	8	0.78	1
	GOTERM_BP_FAT	metal ion transport	5	0.78	1
	GOTERM_BP_FAT	transmembrane transport	6	0.79	1
	GOTERM_BP_FAT	monovalent inorganic cation transport	3	0.88	1

## Sheet: 1+S
1+S
CLUSTER MEDIUM
83 Cluster(s)
Annotation Cluster 1		Enrichment Score: 3.46	Count	P_Value	Benjamini
	GOTERM_BP_FAT	RNA processing	38	6e-07	0.0012
	GOTERM_BP_FAT	mRNA processing	22	0.00028	0.11
	GOTERM_BP_FAT	mRNA metabolic process	23	0.00074	0.17
	GOTERM_BP_FAT	RNA splicing, via transesterification reactions with bulged adenosine as nucleophile	13	0.0012	0.22
	GOTERM_BP_FAT	RNA splicing, via transesterification reactions
	GOTERM_BP_FAT	nuclear mRNA splicing, via spliceosome	13	0.0012	0.22
	GOTERM_BP_FAT	RNA splicing	18	0.0027	0.19
Annotation Cluster 2		Enrichment Score: 2.97	Count	P_Value	Benjamini
	GOTERM_BP_FAT	macromolecular complex assembly	36	0.00024	0.11
	GOTERM_BP_FAT	macromolecular complex subunit organization	37	0.0004	0.13
	GOTERM_BP_FAT	cellular macromolecular complex assembly	20	0.0016	0.26
	GOTERM_BP_FAT	protein complex assembly	27	0.002	0.25
	GOTERM_BP_FAT	protein complex biogenesis	27	0.002	0.25
	GOTERM_BP_FAT	cellular macromolecular complex subunit organization	21	0.0026	0.2
Annotation Cluster 3		Enrichment Score: 2.69	Count	P_Value	Benjamini
	GOTERM_BP_FAT	regulation of translation	13	0.00046	0.13
	GOTERM_BP_FAT	posttranscriptional regulation of gene expression	15	0.0025	0.21
	GOTERM_BP_FAT	regulation of cellular protein metabolic process	24	0.0075	0.29
Annotation Cluster 4		Enrichment Score: 2.32	Count	P_Value	Benjamini
	GOTERM_BP_FAT	cell cycle	37	0.0019	0.26
	GOTERM_BP_FAT	cell cycle process	29	0.0024	0.23
	GOTERM_BP_FAT	mitosis	15	0.0036	0.21
	GOTERM_BP_FAT	nuclear division	15	0.0036	0.21
	GOTERM_BP_FAT	M phase of mitotic cell cycle	15	0.0042	0.23
	GOTERM_BP_FAT	organelle fission	15	0.0051	0.25
	GOTERM_BP_FAT	cell cycle phase	22	0.0063	0.27
	GOTERM_BP_FAT	mitotic cell cycle	20	0.0081	0.3
	GOTERM_BP_FAT	cell division	17	0.0089	0.3
	GOTERM_BP_FAT	M phase	18	0.011	0.35
Annotation Cluster 5		Enrichment Score: 2.02	Count	P_Value	Benjamini
	GOTERM_BP_FAT	regulation of cell cycle	20	0.0025	0.2
	GOTERM_BP_FAT	regulation of mitotic cell cycle	12	0.0036	0.2
	GOTERM_BP_FAT	regulation of cell cycle process	7	0.1	0.74
Annotation Cluster 6		Enrichment Score: 1.96	Count	P_Value	Benjamini
	GOTERM_BP_FAT	positive regulation of nitrogen compound metabolic process	33	0.0012	0.23
	GOTERM_BP_FAT	positive regulation of cellular biosynthetic process	34	0.0016	0.25
	GOTERM_BP_FAT	positive regulation of biosynthetic process	34	0.0021	0.23
	GOTERM_BP_FAT	positive regulation of nucleobase, nucleoside, nucleotide and nucleic acid metabolic process	31	0.0027	0.19
	GOTERM_BP_FAT	positive regulation of macromolecule biosynthetic process	31	0.0053	0.25
	GOTERM_BP_FAT	positive regulation of macromolecule metabolic process	38	0.0056	0.25
	GOTERM_BP_FAT	positive regulation of gene expression	27	0.012	0.36
	GOTERM_BP_FAT	positive regulation of transcription	26	0.015	0.4
	GOTERM_BP_FAT	positive regulation of transcription, DNA-dependent	20	0.078	0.71
	GOTERM_BP_FAT	regulation of transcription from RNA polymerase II promoter	28	0.079	0.7
	GOTERM_BP_FAT	positive regulation of RNA metabolic process	20	0.083	0.71
	GOTERM_BP_FAT	positive regulation of transcription from RNA polymerase II promoter	16	0.099
Annotation Cluster 7		Enrichment Score: 1.93	Count	P_Value	Benjamini
	GOTERM_BP_FAT	protein localization in organelle	12	0.0026	0.2
	GOTERM_BP_FAT	protein targeting	15	0.003	0.2
	GOTERM_BP_FAT	intracellular transport	32	0.003	0.19
	GOTERM_BP_FAT	nucleocytoplasmic transport	12	0.0044	0.23
	GOTERM_BP_FAT	nuclear transport	12	0.0048	0.24
	GOTERM_BP_FAT	establishment of protein localization	35	0.0055	0.25
	GOTERM_BP_FAT	protein transport	34	0.0082	0.3
	GOTERM_BP_FAT	protein import into nucleus	8	0.01	0.33
	GOTERM_BP_FAT	protein import	10	0.011	0.35
	GOTERM_BP_FAT	nuclear import	8	0.012	0.35
	GOTERM_BP_FAT	protein localization	37	0.014	0.39
	GOTERM_BP_FAT	protein localization in nucleus	8	0.016	0.41
	GOTERM_BP_FAT	intracellular protein transport	19	0.018	0.42
	GOTERM_BP_FAT	cellular protein localization	20	0.022	0.45
	GOTERM_BP_FAT	cellular macromolecule localization	20	0.024	0.46
	GOTERM_BP_FAT	nuclear export
Annotation Cluster 8		Enrichment Score: 1.79
	GOTERM_BP_FAT	regulation of small GTPase mediated signal transduction	17	0.002	0.25
	GOTERM_BP_FAT	regulation of Ras protein signal transduction	13	0.015	0.4
	GOTERM_BP_FAT	regulation of Rho protein signal transduction	6	0.14	0.82
Annotation Cluster 9	Count	Enrichment Score: 1.64
	GOTERM_BP_FAT	protein amino acid phosphorylation	29	0.021	0.44
	GOTERM_BP_FAT	phosphorus metabolic process	39	0.022	0.45
	GOTERM_BP_FAT	phosphate metabolic process
	39	0.022
	GOTERM_BP_FAT	phosphorylation
Annotation Cluster 10		Enrichment Score: 1.61	Count	P_Value	Benjamini
	GOTERM_BP_FAT	chromosome organization	26	0.0024	0.21
	GOTERM_BP_FAT	chromatin assembly or disassembly	11	0.003	0.19
	GOTERM_BP_FAT	chromatin organization	20	0.01	0.33
	GOTERM_BP_FAT	chromatin modification	13	0.084	0.71
	GOTERM_BP_FAT	covalent chromatin modification	7	0.14	0.82
	GOTERM_BP_FAT	histone modification	6	0.26	0.91
Annotation Cluster 11		Enrichment Score: 1.6	Count	P_Value	Benjamini
	GOTERM_BP_FAT	macromolecule catabolic process	35	0.0069	0.29
	GOTERM_BP_FAT	protein catabolic process	29	0.0089	0.31
	GOTERM_BP_FAT	ubiquitin-dependent protein catabolic process	14	0.019	0.42
	GOTERM_BP_FAT	modification-dependent macromolecule catabolic process	26	0.019	0.42
	GOTERM_BP_FAT	modification-dependent protein catabolic process	26	0.019	0.42
	GOTERM_BP_FAT	proteolysis involved in cellular protein catabolic process	26	0.03	0.49
	GOTERM_BP_FAT	cellular protein catabolic process	26	0.032	0.5
	GOTERM_BP_FAT	cellular macromolecule catabolic process	30	0.034	0.52
	GOTERM_BP_FAT	proteolysis	34	0.27	0.91
Annotation Cluster 12		Enrichment Score: 1.6	Count	P_Value	Benjamini
	GOTERM_BP_FAT	regulation of programmed cell death	38	0.0023	0.24
	GOTERM_BP_FAT	regulation of cell death	38	0.0024	0.22
	GOTERM_BP_FAT	regulation of apoptosis	37	0.0035	0.21
	GOTERM_BP_FAT	positive regulation of apoptosis	19	0.058	0.64
	GOTERM_BP_FAT	positive regulation of programmed cell death	19	0.06	0.65
	GOTERM_BP_FAT	positive regulation of cell death	19	0.064	0.67
	GOTERM_BP_FAT	induction of apoptosis	13	0.19	0.86
	GOTERM_BP_FAT	induction of programmed cell death	13	0.19	0.86
Annotation Cluster 13		Enrichment Score: 1.6	Count	P_Value	Benjamini
	GOTERM_BP_FAT	cellular response to stress	26	0.016	0.4
	GOTERM_BP_FAT	response to DNA damage stimulus	19	0.018	0.42
	GOTERM_BP_FAT	DNA repair	15	0.029	0.49
	GOTERM_BP_FAT	DNA metabolic process	22	0.046	0.59
Annotation Cluster 14		Enrichment Score: 1.56	Count	P_Value	Benjamini
	GOTERM_BP_FAT	neuron projection development	17	0.0023	0.23
	GOTERM_BP_FAT	neuron development	19	0.0071	0.29
	GOTERM_BP_FAT	cell projection organization	20	0.0077	0.29
	GOTERM_BP_FAT	neuron differentiation	22	0.012	0.34
	GOTERM_BP_FAT	cell morphogenesis	18	0.023	0.45
	GOTERM_BP_FAT	cell part morphogenesis	14	0.028	0.49
	GOTERM_BP_FAT	cellular component morphogenesis	19	0.03	0.49
	GOTERM_BP_FAT	cell morphogenesis involved in differentiation	13	0.042	0.58
	GOTERM_BP_FAT	cell projection morphogenesis	13	0.043	0.57
	GOTERM_BP_FAT	cell morphogenesis involved in neuron differentiation	11	0.069	0.69
	GOTERM_BP_FAT	neuron projection morphogenesis	11	0.077	0.71
	GOTERM_BP_FAT	axonogenesis	10	0.093	0.73
	GOTERM_BP_FAT	axon guidance	6	0.18	0.86
Annotation Cluster 15		Enrichment Score: 1.38	Count	P_Value	Benjamini
	GOTERM_BP_FAT	chromatin assembly or disassembly	11	0.003	0.19
	GOTERM_BP_FAT	DNA packaging	9	0.017	0.41
	GOTERM_BP_FAT	nucleosome assembly	6	0.086	0.71
	GOTERM_BP_FAT	chromatin assembly	6	0.096	0.74
	GOTERM_BP_FAT	protein-DNA complex assembly	6	0.11	0.77
	GOTERM_BP_FAT	nucleosome organization	6	0.12	0.78
Annotation Cluster 16		Enrichment Score: 1.19	Count	P_Value	Benjamini
	GOTERM_BP_FAT	growth	12	0.014	0.38
	GOTERM_BP_FAT	cell growth	6	0.028	0.48
	GOTERM_BP_FAT	regulation of cell size	10	0.12	0.79
	GOTERM_BP_FAT	regulation of cellular component size	10	0.35	0.95
Annotation Cluster 17		Enrichment Score: 1.17	Count	P_Value	Benjamini
	GOTERM_BP_FAT	establishment of RNA localization	7	0.054	0.63
	GOTERM_BP_FAT	nucleic acid transport	7	0.054	0.63
	GOTERM_BP_FAT	RNA transport	7	0.054	0.63
	GOTERM_BP_FAT	RNA localization	7	0.061	0.66
	GOTERM_BP_FAT	mRNA transport	6	0.096	0.74
	GOTERM_BP_FAT	nucleobase, nucleoside, nucleotide and nucleic acid transport	7	0.097	0.73
Annotation Cluster 18		Enrichment Score: 1.17	Count	P_Value	Benjamini
	GOTERM_BP_FAT	protein ubiquitination	8	0.049	0.61
	GOTERM_BP_FAT	protein modification by small protein conjugation	8	0.077	0.71
	GOTERM_BP_FAT	protein modification by small protein conjugation or removal	9	0.08	0.7
Annotation Cluster 19		Enrichment Score: 1.1	Count	P_Value	Benjamini
	GOTERM_BP_FAT	chromosome segregation	6	0.076	0.71
	GOTERM_BP_FAT	mitotic sister chromatid segregation	4	0.079	0.7
	GOTERM_BP_FAT	sister chromatid segregation	4	0.084	0.71
Annotation Cluster 20		Enrichment Score: 1.06	Count	P_Value	Benjamini
	GOTERM_BP_FAT	negative regulation of caspase activity	4	0.013	0.37
	GOTERM_BP_FAT	negative regulation of peptidase activity	4	0.02	0.43
	GOTERM_BP_FAT	regulation of caspase activity	6	0.07	0.69
	GOTERM_BP_FAT	regulation of endopeptidase activity	6	0.079	0.7
	GOTERM_BP_FAT	regulation of peptidase activity	6	0.093	0.73
	GOTERM_BP_FAT	negative regulation of hydrolase activity	4	0.15	0.83
	GOTERM_BP_FAT	negative regulation of molecular function	13	0.23	0.89
	GOTERM_BP_FAT	regulation of hydrolase activity	13	0.24	0.89
	GOTERM_BP_FAT	negative regulation of catalytic activity	11	0.25	0.9
Annotation Cluster 21		Enrichment Score: 1.06	Count	P_Value	Benjamini
	GOTERM_BP_FAT	cell motion	21	0.045	0.59
	GOTERM_BP_FAT	cell motility	14	0.091	0.73
	GOTERM_BP_FAT	localization of cell	14	0.091	0.73
	GOTERM_BP_FAT	cell migration	12	0.15	0.82
Annotation Cluster 22		Enrichment Score: 1.05	Count	P_Value	Benjamini
	GOTERM_BP_FAT	sulfur amino acid metabolic process	4	0.025	0.47
	GOTERM_BP_FAT	aspartate family amino acid metabolic process	4	0.028	0.48
	GOTERM_BP_FAT	cellular amino acid biosynthetic process
	GOTERM_BP_FAT	aspartate family amino acid biosynthetic process	3	0.064	0.67
	GOTERM_BP_FAT	sulfur amino acid biosynthetic process	3	0.064	0.67
	GOTERM_BP_FAT	amine biosynthetic process	6	0.076	0.71
	GOTERM_BP_FAT	organic acid biosynthetic process	8	0.14	0.82
	GOTERM_BP_FAT	carboxylic acid biosynthetic process	8	0.14	0.82
	GOTERM_BP_FAT	sulfur compound biosynthetic process	4	0.16	0.84
	GOTERM_BP_FAT	sulfur metabolic process
	5	0.28
Annotation Cluster 24		Enrichment Score: 1.01	Count	P_Value	Benjamini
	GOTERM_BP_FAT	regulation of transcription	90	0.02	0.43
	GOTERM_BP_FAT	regulation of RNA metabolic process	59	0.15	0.82
	GOTERM_BP_FAT	transcription	67	0.16	0.84
	GOTERM_BP_FAT	regulation of transcription, DNA-dependent	57	0.18	0.86
Annotation Cluster 25		Enrichment Score: 1.01	Count	P_Value	Benjamini
	GOTERM_BP_FAT	response to unfolded protein	6	0.048	0.6
	GOTERM_BP_FAT	ER-nuclear signaling pathway	4	0.073	0.7
	GOTERM_BP_FAT	response to protein stimulus	7	0.079	0.7
	GOTERM_BP_FAT	endoplasmic reticulum unfolded protein response	3	0.12	0.78
	GOTERM_BP_FAT	cellular response to unfolded protein	3	0.12	0.78
	GOTERM_BP_FAT	response to endoplasmic reticulum stress	3	0.25	0.9
Annotation Cluster 26		Enrichment Score: 0.97	Count	P_Value	Benjamini
	GOTERM_BP_FAT	intracellular receptor-mediated signaling pathway	6	0.059	0.64
	GOTERM_BP_FAT	steroid hormone receptor signaling pathway	5	0.079	0.7
	GOTERM_BP_FAT	androgen receptor signaling pathway	3	0.27	0.91
Annotation Cluster 27		Enrichment Score: 0.94	Count	P_Value	Benjamini
	GOTERM_BP_FAT	death	29	0.05	0.61
	GOTERM_BP_FAT	cell death	28	0.072	0.7
	GOTERM_BP_FAT	programmed cell death	22	0.19	0.86
	GOTERM_BP_FAT	apoptosis	21	0.24	0.9
Annotation Cluster 28		Enrichment Score: 0.94	Count	P_Value	Benjamini
	GOTERM_BP_FAT	positive regulation of DNA replication	4	0.042	0.58
	GOTERM_BP_FAT	regulation of DNA replication	5	0.095	0.73
	GOTERM_BP_FAT	positive regulation of DNA metabolic process	4	0.21	0.87
	GOTERM_BP_FAT	regulation of DNA metabolic process	6	0.21	0.88
Annotation Cluster 29		Enrichment Score: 0.91	Count	P_Value	Benjamini
	GOTERM_BP_FAT	morphogenesis of an epithelium	9	0.0073	0.29
	GOTERM_BP_FAT	smoothened signaling pathway	3	0.097	0.73
	GOTERM_BP_FAT	branching morphogenesis of a tube	5	0.11	0.76
	GOTERM_BP_FAT	epithelial tube morphogenesis	5	0.12	0.78
	GOTERM_BP_FAT	neural tube development	5	0.12	0.79
	GOTERM_BP_FAT	tissue morphogenesis	9	0.13	0.8
	GOTERM_BP_FAT	tube morphogenesis	7	0.15	0.82
	GOTERM_BP_FAT	morphogenesis of a branching structure	5	0.15	0.83
	GOTERM_BP_FAT	epithelium development	10	0.19	0.86
	GOTERM_BP_FAT	morphogenesis of embryonic epithelium	4	0.22	0.88
	GOTERM_BP_FAT	embryonic morphogenesis	12	0.24	0.9
	GOTERM_BP_FAT	tube development	8	0.42	0.97
Annotation Cluster 30		Enrichment Score: 0.89
		Count
	GOTERM_BP_FAT	morphogenesis of an epithelium	9	0.0073	0.29
	GOTERM_BP_FAT	tissue morphogenesis	9	0.13	0.8
	GOTERM_BP_FAT	determination of left/right symmetry	3	0.33	0.94
	GOTERM_BP_FAT	determination of bilateral symmetry	3	0.34	0.94
	GOTERM_BP_FAT	determination of symmetry	3	0.34	0.94
Annotation Cluster 32		Enrichment Score: 0.84	Count	P_Value	Benjamini
	GOTERM_BP_FAT	regulation of neuron apoptosis	7	0.04	0.57
	GOTERM_BP_FAT	negative regulation of neuron apoptosis	5	0.054	0.63
	GOTERM_BP_FAT	negative regulation of programmed cell death	14	0.21	0.87
	GOTERM_BP_FAT	negative regulation of cell death	14	0.21	0.88
	GOTERM_BP_FAT	negative regulation of apoptosis	13	0.29	0.93
	GOTERM_BP_FAT	anti-apoptosis	8	0.36	0.95
Annotation Cluster 33		Enrichment Score: 0.79	Count	P_Value	Benjamini
	GOTERM_BP_FAT	biopolymer methylation	5	0.13	0.79
	GOTERM_BP_FAT	methylation	5	0.16	0.84
	GOTERM_BP_FAT	one-carbon metabolic process	6	0.2	0.87
Annotation Cluster 34		Enrichment Score: 0.78	Count	P_Value	Benjamini
	GOTERM_BP_FAT	negative regulation of macromolecule metabolic process	29	0.057	0.64
	GOTERM_BP_FAT	negative regulation of gene expression	21	0.073	0.7
	GOTERM_BP_FAT	negative regulation of transcription	19	0.093	0.73
	GOTERM_BP_FAT	negative regulation of nucleobase, nucleoside, nucleotide and nucleic acid metabolic process	20	0.13	0.79
	GOTERM_BP_FAT	negative regulation of nitrogen compound metabolic process	20	0.14	0.82
	GOTERM_BP_FAT	negative regulation of biosynthetic process	21	0.18	0.86
	GOTERM_BP_FAT	negative regulation of macromolecule biosynthetic process	20	0.19	0.86
	GOTERM_BP_FAT	negative regulation of cellular biosynthetic process	20	0.22	0.88
	GOTERM_BP_FAT	negative regulation of transcription, DNA-dependent	13	0.3	0.93
	GOTERM_BP_FAT	negative regulation of RNA metabolic process	13	0.32	0.93
	GOTERM_BP_FAT	negative regulation of transcription from RNA polymerase II promoter	9	0.46	0.97
Annotation Cluster 35		Enrichment Score: 0.74	Count	P_Value	Benjamini
	GOTERM_BP_FAT	visual learning	4	0.039	0.56
	GOTERM_BP_FAT	visual behavior	4	0.055	0.63
	GOTERM_BP_FAT	learning	5	0.086	0.71
	GOTERM_BP_FAT	response to radiation	8	0.33	0.94
	GOTERM_BP_FAT	learning or memory	5	0.38	0.95
	GOTERM_BP_FAT	response to light stimulus	5	0.54	0.99
	GOTERM_BP_FAT	response to abiotic stimulus	11	0.58	0.99
Annotation Cluster 36		Enrichment Score: 0.72	Count	P_Value	Benjamini
	GOTERM_BP_FAT	regulation of protein ubiquitination	8	0.022	0.45
	GOTERM_BP_FAT	proteasomal ubiquitin-dependent protein catabolic process	8	0.024	0.46
	GOTERM_BP_FAT	proteasomal protein catabolic process	8	0.024	0.46
	GOTERM_BP_FAT	negative regulation of protein metabolic process	10	0.079	0.7
	GOTERM_BP_FAT	negative regulation of cellular protein metabolic process	9	0.13	0.8
	GOTERM_BP_FAT	regulation of ubiquitin-protein ligase activity during mitotic cell cycle	5	0.14	0.81
	GOTERM_BP_FAT	ER-associated protein catabolic process	3	0.14	0.82
	GOTERM_BP_FAT	regulation of ubiquitin-protein ligase activity	5	0.17	0.85
	GOTERM_BP_FAT	regulation of ligase activity	5	0.19	0.86
	GOTERM_BP_FAT	positive regulation of protein ubiquitination	5	0.21	0.87
	GOTERM_BP_FAT	negative regulation of protein modification process	6	0.24	0.9
	GOTERM_BP_FAT	anaphase-promoting complex-dependent proteasomal ubiquitin-dependent protein catabolic process	4	0.27	0.92
	GOTERM_BP_FAT	positive regulation of ubiquitin-protein ligase activity during mitotic cell cycle	4	0.3	0.93
	GOTERM_BP_FAT	positive regulation of ubiquitin-protein ligase activity	4	0.31	0.93
	GOTERM_BP_FAT	regulation of protein modification process	11	0.31	0.93
	GOTERM_BP_FAT	positive regulation of cellular protein metabolic process	9	0.33	0.94
	GOTERM_BP_FAT	positive regulation of ligase activity	4	0.33	0.94
	GOTERM_BP_FAT	negative regulation of protein ubiquitination	4	0.34	0.94
	GOTERM_BP_FAT	positive regulation of protein metabolic process	9	0.37	0.95
	GOTERM_BP_FAT	positive regulation of protein modification process	7	0.42	0.97
	GOTERM_BP_FAT	negative regulation of ubiquitin-protein ligase activity during mitotic cell cycle	3	0.55	0.99
	GOTERM_BP_FAT	negative regulation of ubiquitin-protein ligase activity	3	0.56	0.99
	GOTERM_BP_FAT	negative regulation of ligase activity	3	0.56	0.99
Annotation Cluster 37		Enrichment Score: 0.64	Count	P_Value	Benjamini
	GOTERM_BP_FAT	regulation of GTPase activity	7	0.13	0.8
	GOTERM_BP_FAT	regulation of ARF GTPase activity	3	0.18	0.86
	GOTERM_BP_FAT	regulation of Ras GTPase activity	5	0.33	0.94
	GOTERM_BP_FAT	regulation of ARF protein signal transduction	3	0.35	0.95
Annotation Cluster 38		Enrichment Score: 0.63	Count	P_Value	Benjamini
	GOTERM_BP_FAT	interphase of mitotic cell cycle	6	0.16	0.84
	GOTERM_BP_FAT	interphase	6	0.18	0.85
	GOTERM_BP_FAT	G1/S transition of mitotic cell cycle	3	0.47	0.97
Annotation Cluster 39		Enrichment Score: 0.61	Count	P_Value	Benjamini
	GOTERM_BP_FAT	glycolysis	4	0.14	0.82
	GOTERM_BP_FAT	hexose metabolic process	9	0.17	0.85
	GOTERM_BP_FAT	carbohydrate catabolic process	6	0.19	0.86
	GOTERM_BP_FAT	alcohol catabolic process	5	0.19	0.86
	GOTERM_BP_FAT	cellular carbohydrate catabolic process	5	0.21	0.88
	GOTERM_BP_FAT	glucose catabolic process	4	0.22	0.88
	GOTERM_BP_FAT	glucose metabolic process	7	0.26	0.91
	GOTERM_BP_FAT	monosaccharide metabolic process	9	0.28	0.92
	GOTERM_BP_FAT	hexose catabolic process	4	0.3	0.93
	GOTERM_BP_FAT	monosaccharide catabolic process	4	0.32	0.94
	GOTERM_BP_FAT	generation of precursor metabolites and energy	9	0.65	1
Annotation Cluster 40		Enrichment Score: 0.61	Count	P_Value	Benjamini
	GOTERM_BP_FAT	dopamine metabolic process	3	0.11	0.76
	GOTERM_BP_FAT	cellular amino acid derivative metabolic process	8	0.18	0.86
	GOTERM_BP_FAT	catechol metabolic process	3	0.25	0.9
	GOTERM_BP_FAT	diol metabolic process	3	0.25	0.9
	GOTERM_BP_FAT	catecholamine metabolic process	3	0.25	0.9
	GOTERM_BP_FAT	phenol metabolic process	3	0.26	0.91
	GOTERM_BP_FAT	biogenic amine metabolic process	3	0.76	1
Annotation Cluster 41		Enrichment Score: 0.6	Count	P_Value	Benjamini
	GOTERM_BP_FAT	membrane organization	16	0.12	0.78
	GOTERM_BP_FAT	vesicle-mediated transport	21	0.19	0.86
	GOTERM_BP_FAT	endocytosis	8	0.42	0.97
	GOTERM_BP_FAT	membrane invagination	8	0.42	0.97
Annotation Cluster 42		Enrichment Score: 0.59	Count	P_Value	Benjamini
	GOTERM_BP_FAT	reproductive developmental process	13	0.065	0.67
	GOTERM_BP_FAT	sex differentiation	8	0.13	0.8
	GOTERM_BP_FAT	development of primary sexual characteristics	7	0.15	0.82
	GOTERM_BP_FAT	male sex differentiation	5	0.15	0.82
	GOTERM_BP_FAT	development of primary male sexual characteristics	4	0.27	0.92
	GOTERM_BP_FAT	gonad development	5	0.38	0.95
	GOTERM_BP_FAT	male gonad development	3	0.43	0.97
	GOTERM_BP_FAT	reproductive structure development	5	0.47	0.98
	GOTERM_BP_FAT	female sex differentiation	3	0.58	0.99
	GOTERM_BP_FAT	development of primary female sexual characteristics	3	0.58	0.99
Annotation Cluster 43		Enrichment Score: 0.58	Count	P_Value	Benjamini
	GOTERM_BP_FAT	pattern specification process	16	0.0082	0.29
	GOTERM_BP_FAT	regionalization	12	0.023	0.45
	GOTERM_BP_FAT	chordate embryonic development	16	0.046	0.59
	GOTERM_BP_FAT	embryonic development ending in birth or egg hatching	16	0.049	0.6
	GOTERM_BP_FAT	cranial nerve development	3	0.097	0.73
	GOTERM_BP_FAT	nerve development	3	0.15	0.83
	GOTERM_BP_FAT	embryonic skeletal system development	5	0.17	0.84
	GOTERM_BP_FAT	anterior/posterior pattern formation	7	0.2	0.86
	GOTERM_BP_FAT	embryonic morphogenesis	12	0.24	0.9
	GOTERM_BP_FAT	ear development	5	0.27	0.92
	GOTERM_BP_FAT	skeletal system development	12	0.28	0.92
	GOTERM_BP_FAT	embryonic organ morphogenesis	6	0.31	0.93
	GOTERM_BP_FAT	osteoblast differentiation	3	0.33	0.94
	GOTERM_BP_FAT	cartilage development	4	0.34	0.94
	GOTERM_BP_FAT	embryonic organ development	7	0.35	0.95
	GOTERM_BP_FAT	in utero embryonic development	7	0.37	0.95
	GOTERM_BP_FAT	inner ear development	4	0.38	0.95
	GOTERM_BP_FAT	skeletal system morphogenesis	5	0.38	0.95
	GOTERM_BP_FAT	ossification	5	0.4	0.96
	GOTERM_BP_FAT	embryonic appendage morphogenesis	4	0.44	0.97
	GOTERM_BP_FAT	embryonic limb morphogenesis	4	0.44	0.97
	GOTERM_BP_FAT	bone development	5	0.45	0.97
	GOTERM_BP_FAT	sensory organ development	8	0.46	0.97
	GOTERM_BP_FAT	embryonic skeletal system morphogenesis	3	0.48	0.98
	GOTERM_BP_FAT	limb morphogenesis	4	0.53	0.98
	GOTERM_BP_FAT	appendage morphogenesis	4	0.53	0.98
	GOTERM_BP_FAT	limb development	4	0.55	0.99
	GOTERM_BP_FAT	appendage development	4	0.55	0.99
	GOTERM_BP_FAT	ear morphogenesis	3	0.55	0.99
	GOTERM_BP_FAT	eye morphogenesis	3	0.58	0.99
	GOTERM_BP_FAT	eye development	4	0.72	1
	GOTERM_BP_FAT	camera-type eye development	3	0.8	1
Annotation Cluster 44		Enrichment Score: 0.55	Count	P_Value	Benjamini
	GOTERM_BP_FAT	odontogenesis	4	0.19	0.86
	GOTERM_BP_FAT	odontogenesis of dentine-containing tooth	3	0.3	0.93
	GOTERM_BP_FAT	neuron fate commitment	3	0.33	0.94
	GOTERM_BP_FAT	cell fate commitment	6	0.35	0.95
Annotation Cluster 45		Enrichment Score: 0.54	Count	P_Value	Benjamini
	GOTERM_BP_FAT	mitochondrial membrane organization	3	0.22	0.89
	GOTERM_BP_FAT	mitochondrial transport	4	0.3	0.93
	GOTERM_BP_FAT	mitochondrion organization	6	0.34	0.94
Annotation Cluster 46		Enrichment Score: 0.54	Count	P_Value	Benjamini
	GOTERM_BP_FAT	regulation of cell cycle process	7	0.1	0.74
	GOTERM_BP_FAT	regulation of mitotic metaphase/anaphase transition	3	0.12	0.79
	GOTERM_BP_FAT	regulation of mitosis	3	0.47	0.97
	GOTERM_BP_FAT	regulation of nuclear division	3	0.47	0.97
	GOTERM_BP_FAT	regulation of organelle organization	6	0.73	1
Annotation Cluster 47		Enrichment Score: 0.53	Count	P_Value	Benjamini
	GOTERM_BP_FAT	purine ribonucleoside metabolic process	3	0.19	0.86
	GOTERM_BP_FAT	purine nucleoside metabolic process	3	0.19	0.86
	GOTERM_BP_FAT	ribonucleoside metabolic process	3	0.37	0.95
	GOTERM_BP_FAT	nucleoside metabolic process	3	0.54	0.99
Annotation Cluster 48		Enrichment Score: 0.53	Count	P_Value	Benjamini
	GOTERM_BP_FAT	adult locomotory behavior	6	0.017	0.41
	GOTERM_BP_FAT	locomotory behavior	13	0.084	0.71
	GOTERM_BP_FAT	learning	5	0.086	0.71
	GOTERM_BP_FAT	adult behavior	6	0.093	0.73
	GOTERM_BP_FAT	learning or memory	5	0.38	0.95
	GOTERM_BP_FAT	behavior	13	0.66	1
	GOTERM_BP_FAT	synaptic transmission	8	0.73	1
	GOTERM_BP_FAT	transmission of nerve impulse	9	0.77	1
	GOTERM_BP_FAT	cell-cell signaling	12	0.95	1
	GOTERM_BP_FAT	neurological system process	21	1	1
	GOTERM_BP_FAT	cognition	14	1	1
Annotation Cluster 49		Enrichment Score: 0.51	Count	P_Value	Benjamini
	GOTERM_BP_FAT	regulation of steroid biosynthetic process	3	0.15	0.83
	GOTERM_BP_FAT	regulation of steroid metabolic process	3	0.27	0.91
	GOTERM_BP_FAT	regulation of lipid biosynthetic process	3	0.36	0.95
	GOTERM_BP_FAT	regulation of lipid metabolic process	4	0.61	0.99
Annotation Cluster 50		Enrichment Score: 0.49	Count	P_Value	Benjamini
	GOTERM_BP_FAT	blood vessel development	11	0.15	0.82
	GOTERM_BP_FAT	vasculature development	11	0.17	0.84
	GOTERM_BP_FAT	blood vessel morphogenesis	7	0.55	0.99
	GOTERM_BP_FAT	angiogenesis	4	0.79	1
Annotation Cluster 51		Enrichment Score: 0.48	Count	P_Value	Benjamini
	GOTERM_BP_FAT	tRNA metabolic process	6	0.23	0.9
	GOTERM_BP_FAT	tRNA aminoacylation for protein translation	3	0.37	0.95
	GOTERM_BP_FAT	tRNA aminoacylation	3	0.37	0.95
	GOTERM_BP_FAT	amino acid activation	3	0.37	0.95
Annotation Cluster 52		Enrichment Score: 0.46	Count	P_Value	Benjamini
	GOTERM_BP_FAT	telencephalon development	4	0.27	0.92
	GOTERM_BP_FAT	pallium development	3	0.37	0.95
	GOTERM_BP_FAT	forebrain development	6	0.42	0.97
Annotation Cluster 53		Enrichment Score: 0.42	Count	P_Value	Benjamini
	GOTERM_BP_FAT	actin cytoskeleton organization	9	0.3	0.93
	GOTERM_BP_FAT	actin filament organization	4	0.33	0.94
	GOTERM_BP_FAT	actin filament-based process	9	0.36	0.95
	GOTERM_BP_FAT	cytoskeleton organization	13	0.56	0.99
Annotation Cluster 54		Enrichment Score: 0.42	Count	P_Value	Benjamini
	GOTERM_BP_FAT	negative regulation of phosphorylation	3	0.36	0.95
	GOTERM_BP_FAT	negative regulation of phosphate metabolic process	3	0.39	0.96
	GOTERM_BP_FAT	negative regulation of phosphorus metabolic process	3	0.39	0.96
Annotation Cluster 55		Enrichment Score: 0.41	Count	P_Value	Benjamini
	GOTERM_BP_FAT	neuromuscular junction development	3	0.11	0.76
	GOTERM_BP_FAT	skeletal muscle fiber development	3	0.18	0.86
	GOTERM_BP_FAT	muscle cell differentiation	6	0.25	0.9
	GOTERM_BP_FAT	muscle fiber development	3	0.26	0.91
	GOTERM_BP_FAT	striated muscle cell development	3	0.43	0.97
	GOTERM_BP_FAT	striated muscle cell differentiation	4	0.45	0.97
	GOTERM_BP_FAT	muscle cell development	3	0.47	0.97
	GOTERM_BP_FAT	extracellular structure organization	6	0.48	0.98
	GOTERM_BP_FAT	synapse organization	3	0.51	0.98
	GOTERM_BP_FAT	muscle organ development	7	0.55	0.99
	GOTERM_BP_FAT	skeletal muscle tissue development	3	0.55	0.99
	GOTERM_BP_FAT	skeletal muscle organ development	3	0.55	0.99
	GOTERM_BP_FAT	striated muscle tissue development	4	0.65	1
	GOTERM_BP_FAT	muscle tissue development	4	0.68	1
Annotation Cluster 56		Enrichment Score: 0.35	Count	P_Value	Benjamini
	GOTERM_BP_FAT	regulation of protein kinase activity	12	0.37	0.95
	GOTERM_BP_FAT	regulation of kinase activity	12	0.42	0.97
	GOTERM_BP_FAT	regulation of phosphorylation	15	0.43	0.97
	GOTERM_BP_FAT	regulation of transferase activity	12	0.47	0.98
	GOTERM_BP_FAT	regulation of phosphorus metabolic process	15	0.49	0.98
	GOTERM_BP_FAT	regulation of phosphate metabolic process	15	0.49	0.98
Annotation Cluster 57		Enrichment Score: 0.34	Count	P_Value	Benjamini
	GOTERM_BP_FAT	transcription, DNA-dependent	10	0.43	0.97
	GOTERM_BP_FAT	RNA biosynthetic process	10	0.45	0.97
	GOTERM_BP_FAT	transcription from RNA polymerase II promoter	8	0.47	0.98
Annotation Cluster 58		Enrichment Score: 0.34	Count	P_Value	Benjamini
	GOTERM_BP_FAT	insulin receptor signaling pathway	3	0.28	0.92
	GOTERM_BP_FAT	transmembrane receptor protein tyrosine kinase signaling pathway	9	0.29	0.93
	GOTERM_BP_FAT	response to peptide hormone stimulus	6	0.43	0.97
	GOTERM_BP_FAT	response to insulin stimulus	4	0.53	0.98
	GOTERM_BP_FAT	cellular response to insulin stimulus	3	0.57	0.99
	GOTERM_BP_FAT	cellular response to hormone stimulus	3	0.89	1
Annotation Cluster 59		Enrichment Score: 0.31	Count	P_Value	Benjamini
	GOTERM_BP_FAT	nucleotide catabolic process	3	0.42	0.97
	GOTERM_BP_FAT	nucleobase, nucleoside, nucleotide and nucleic acid catabolic process	3	0.48	0.98
	GOTERM_BP_FAT	nucleobase, nucleoside and nucleotide catabolic process	3	0.48	0.98
	GOTERM_BP_FAT	nitrogen compound catabolic process	3	0.56	0.99
Annotation Cluster 60		Enrichment Score: 0.3	Count	P_Value	Benjamini
	GOTERM_BP_FAT	response to peptide hormone stimulus	6	0.43	0.97
	GOTERM_BP_FAT	response to organic substance	22	0.45	0.97
	GOTERM_BP_FAT	response to hormone stimulus	11	0.58	0.99
	GOTERM_BP_FAT	response to endogenous stimulus	12	0.58	0.99
Annotation Cluster 61		Enrichment Score: 0.29	Count	P_Value	Benjamini
	GOTERM_BP_FAT	positive regulation of cell motion	5	0.29	0.93
	GOTERM_BP_FAT	positive regulation of cell migration	4	0.45	0.97
	GOTERM_BP_FAT	regulation of cell motion	7	0.46	0.97
	GOTERM_BP_FAT	positive regulation of locomotion	4	0.52	0.98
	GOTERM_BP_FAT	regulation of cell migration	5	0.7	1
	GOTERM_BP_FAT	regulation of locomotion	5	0.79	1
Annotation Cluster 62		Enrichment Score: 0.27	Count	P_Value	Benjamini
	GOTERM_BP_FAT	cellular homeostasis	16	0.32	0.94
	GOTERM_BP_FAT	di-, tri-valent inorganic cation homeostasis	9	0.36	0.95
	GOTERM_BP_FAT	ion homeostasis	14	0.36	0.95
	GOTERM_BP_FAT	cation homeostasis	10	0.41	0.96
	GOTERM_BP_FAT	cellular di-, tri-valent inorganic cation homeostasis	8	0.45	0.97
	GOTERM_BP_FAT	cellular ion homeostasis	12	0.48	0.98
	GOTERM_BP_FAT	cellular chemical homeostasis	12	0.5	0.98
	GOTERM_BP_FAT	cellular cation homeostasis	8	0.57	0.99
	GOTERM_BP_FAT	chemical homeostasis	15	0.57	0.99
	GOTERM_BP_FAT	homeostatic process	20	0.71	1
	GOTERM_BP_FAT	cellular calcium ion homeostasis	5	0.76	1
	GOTERM_BP_FAT	calcium ion homeostasis	5	0.77	1
	GOTERM_BP_FAT	cellular metal ion homeostasis	5	0.8	1
	GOTERM_BP_FAT	metal ion homeostasis	5	0.83	1
Annotation Cluster 63		Enrichment Score: 0.27	Count	P_Value	Benjamini
	GOTERM_BP_FAT	learning	5	0.086	0.71
	GOTERM_BP_FAT	learning or memory	5	0.38	0.95
	GOTERM_BP_FAT	regulation of synaptic transmission	3	0.9	1
	GOTERM_BP_FAT	regulation of transmission of nerve impulse	3	0.92	1
	GOTERM_BP_FAT	regulation of neurological system process	3	0.93	1
	GOTERM_BP_FAT	regulation of system process	4	0.99	1
Annotation Cluster 64		Enrichment Score: 0.22	Count	P_Value	Benjamini
	GOTERM_BP_FAT	regulation of cellular response to stress	5	0.32	0.94
	GOTERM_BP_FAT	positive regulation of protein kinase cascade	6	0.5	0.98
	GOTERM_BP_FAT	regulation of JNK cascade	3	0.55	0.99
	GOTERM_BP_FAT	regulation of protein kinase cascade	8	0.55	0.99
	GOTERM_BP_FAT	regulation of stress-activated protein kinase signaling pathway	3	0.58	0.99
	GOTERM_BP_FAT	regulation of I-kappaB kinase/NF-kappaB cascade	4	0.58	0.99
	GOTERM_BP_FAT	positive regulation of signal transduction	8	0.72	1
	GOTERM_BP_FAT	positive regulation of I-kappaB kinase/NF-kappaB cascade	3	0.76	1
	GOTERM_BP_FAT	regulation of MAPKKK cascade	3	0.81	1
	GOTERM_BP_FAT	positive regulation of cell communication	8	0.82	1
Annotation Cluster 65		Enrichment Score: 0.22	Count	P_Value	Benjamini
	GOTERM_BP_FAT	in utero embryonic development	7	0.37	0.95
	GOTERM_BP_FAT	respiratory system development	4	0.58	0.99
	GOTERM_BP_FAT	lung development	3	0.77	1
	GOTERM_BP_FAT	respiratory tube development	3	0.78	1
Annotation Cluster 66		Enrichment Score: 0.22	Count	P_Value	Benjamini
	GOTERM_BP_FAT	hemopoietic or lymphoid organ development	10	0.31	0.93
	GOTERM_BP_FAT	hemopoiesis	9	0.34	0.94
	GOTERM_BP_FAT	immune system development	10	0.37	0.95
	GOTERM_BP_FAT	T cell differentiation	3	0.55	0.99
	GOTERM_BP_FAT	lymphocyte differentiation	4	0.55	0.99
	GOTERM_BP_FAT	leukocyte differentiation	4	0.71	1
	GOTERM_BP_FAT	T cell activation	3	0.87	1
	GOTERM_BP_FAT	lymphocyte activation	4	0.92	1
	GOTERM_BP_FAT	leukocyte activation	4	0.97	1
	GOTERM_BP_FAT	cell activation	4	0.99	1
Annotation Cluster 67		Enrichment Score: 0.2	Count	P_Value	Benjamini
	GOTERM_BP_FAT	regulation of cell development	7	0.52	0.98
	GOTERM_BP_FAT	regulation of nervous system development	6	0.63	0.99
	GOTERM_BP_FAT	regulation of neurogenesis	5	0.69	1
	GOTERM_BP_FAT	regulation of neuron differentiation	4	0.72	1
Annotation Cluster 68		Enrichment Score: 0.18	Count	P_Value	Benjamini
	GOTERM_BP_FAT	sensory perception of sound	4	0.51	0.98
	GOTERM_BP_FAT	sensory perception of mechanical stimulus	4	0.55	0.99
	GOTERM_BP_FAT	sensory perception	8	1	1
Annotation Cluster 69		Enrichment Score: 0.18	Count	P_Value	Benjamini
	GOTERM_BP_FAT	sodium ion transport	5	0.49	0.98
	GOTERM_BP_FAT	cation transport	16	0.58	0.99
	GOTERM_BP_FAT	metal ion transport	13	0.65	1
	GOTERM_BP_FAT	ion transport	20	0.74	1
	GOTERM_BP_FAT	monovalent inorganic cation transport	7	0.88	1
Annotation Cluster 70		Enrichment Score: 0.18	Count	P_Value	Benjamini
	GOTERM_BP_FAT	gamete generation	12	0.55	0.99
	GOTERM_BP_FAT	multicellular organism reproduction	14	0.61	0.99
	GOTERM_BP_FAT	reproductive process in a multicellular organism	14	0.61	0.99
	GOTERM_BP_FAT	sexual reproduction	12	0.74	1
	GOTERM_BP_FAT	spermatogenesis	8	0.76	1
	GOTERM_BP_FAT	male gamete generation	8	0.76	1
Annotation Cluster 71		Enrichment Score: 0.18	Count	P_Value	Benjamini
	GOTERM_BP_FAT	regulation of transcription factor activity	4	0.55	0.99
	GOTERM_BP_FAT	regulation of DNA binding	4	0.66	1
	GOTERM_BP_FAT	regulation of binding	4	0.81	1
Annotation Cluster 72		Enrichment Score: 0.15	Count	P_Value	Benjamini
	GOTERM_BP_FAT	response to vitamin	3	0.55	0.99
	GOTERM_BP_FAT	response to extracellular stimulus	6	0.74	1
	GOTERM_BP_FAT	response to nutrient	4	0.75	1
	GOTERM_BP_FAT	response to nutrient levels	5	0.8	1
Annotation Cluster 73		Enrichment Score: 0.15	Count	P_Value	Benjamini
	GOTERM_BP_FAT	negative regulation of cell size	4	0.53	0.98
	GOTERM_BP_FAT	negative regulation of cell growth	3	0.73	1
	GOTERM_BP_FAT	regulation of cell growth	5	0.8	1
	GOTERM_BP_FAT	negative regulation of growth	3	0.82	1
Annotation Cluster 74		Enrichment Score: 0.14	Count	P_Value	Benjamini
	GOTERM_BP_FAT	positive regulation of organelle organization	3	0.68	1
	GOTERM_BP_FAT	regulation of organelle organization	6	0.73	1
	GOTERM_BP_FAT	positive regulation of cellular component organization	5	0.75	1
Annotation Cluster 75		Enrichment Score: 0.14	Count	P_Value	Benjamini
	GOTERM_BP_FAT	negative regulation of protein kinase activity	3	0.7	1
	GOTERM_BP_FAT	negative regulation of kinase activity	3	0.72	1
	GOTERM_BP_FAT	negative regulation of transferase activity	3	0.75	1
Annotation Cluster 76		Enrichment Score: 0.1	Count	P_Value	Benjamini
	GOTERM_BP_FAT	coenzyme biosynthetic process	3	0.58	0.99
	GOTERM_BP_FAT	cofactor biosynthetic process	3	0.76	1
	GOTERM_BP_FAT	coenzyme metabolic process	3	0.93	1
	GOTERM_BP_FAT	cofactor metabolic process	3	0.97	1
Annotation Cluster 77		Enrichment Score: 0.09	Count	P_Value	Benjamini
	GOTERM_BP_FAT	ATP biosynthetic process	3	0.72	1
	GOTERM_BP_FAT	purine ribonucleoside triphosphate biosynthetic process	3	0.76	1
	GOTERM_BP_FAT	purine nucleotide metabolic process	5	0.77	1
	GOTERM_BP_FAT	nucleotide biosynthetic process	5	0.77	1
	GOTERM_BP_FAT	ribonucleoside triphosphate biosynthetic process	3	0.77	1
	GOTERM_BP_FAT	purine nucleoside triphosphate biosynthetic process	3	0.77	1
	GOTERM_BP_FAT	nucleoside triphosphate biosynthetic process	3	0.78	1
	GOTERM_BP_FAT	purine nucleotide biosynthetic process	4	0.79	1
	GOTERM_BP_FAT	nucleobase, nucleoside, nucleotide and nucleic acid biosynthetic process	5	0.79	1
	GOTERM_BP_FAT	nucleobase, nucleoside and nucleotide biosynthetic process	5	0.79	1
	GOTERM_BP_FAT	ATP metabolic process	3	0.8	1
	GOTERM_BP_FAT	purine ribonucleoside triphosphate metabolic process	3	0.84	1
	GOTERM_BP_FAT	purine ribonucleotide biosynthetic process	3	0.84	1
	GOTERM_BP_FAT	ribonucleoside triphosphate metabolic process	3	0.85	1
	GOTERM_BP_FAT	purine nucleoside triphosphate metabolic process	3	0.86	1
	GOTERM_BP_FAT	ribonucleotide biosynthetic process	3	0.87	1
	GOTERM_BP_FAT	nucleoside triphosphate metabolic process	3	0.88	1
	GOTERM_BP_FAT	purine ribonucleotide metabolic process	3	0.9	1
	GOTERM_BP_FAT	ribonucleotide metabolic process	3	0.92	1
Annotation Cluster 78		Enrichment Score: 0.08	Count	P_Value	Benjamini
	GOTERM_BP_FAT	positive regulation of immune response	4	0.78	1
	GOTERM_BP_FAT	positive regulation of response to stimulus	6	0.79	1
	GOTERM_BP_FAT	positive regulation of immune system process	4	0.96	1
Annotation Cluster 79		Enrichment Score: 0.06	Count	P_Value	Benjamini
	GOTERM_BP_FAT	regulation of protein transport	3	0.83	1
	GOTERM_BP_FAT	regulation of establishment of protein localization	3	0.86	1
	GOTERM_BP_FAT	regulation of protein localization	3	0.9	1
Annotation Cluster 80		Enrichment Score: 0.05	Count	P_Value	Benjamini
	GOTERM_BP_FAT	protein amino acid glycosylation	3	0.88	1
	GOTERM_BP_FAT	biopolymer glycosylation	3	0.88	1
	GOTERM_BP_FAT	glycosylation	3	0.88	1
	GOTERM_BP_FAT	glycoprotein metabolic process	4	0.92	1
	GOTERM_BP_FAT	glycoprotein biosynthetic process	3	0.94	1
Annotation Cluster 81		Enrichment Score: 0.02	Count	P_Value	Benjamini
	GOTERM_BP_FAT	positive regulation of catalytic activity	11	0.92	1
	GOTERM_BP_FAT	positive regulation of protein kinase activity	4	0.95	1
	GOTERM_BP_FAT	positive regulation of kinase activity	4	0.96	1
	GOTERM_BP_FAT	positive regulation of transferase activity	4	0.97	1
Annotation Cluster 82		Enrichment Score: 0.01	Count	P_Value	Benjamini
	GOTERM_BP_FAT	cell-cell adhesion	5	0.95	1
	GOTERM_BP_FAT	cell adhesion	12	0.99	1
	GOTERM_BP_FAT	biological adhesion	12	0.99	1
Annotation Cluster 83		Enrichment Score: 0	Count	P_Value	Benjamini
	GOTERM_BP_FAT	sensory perception of light stimulus	3	0.98	1
	GOTERM_BP_FAT	visual perception	3	0.98	1
	GOTERM_BP_FAT	sensory perception	8	1	1
were not clustered.
Please cite Nature Protocols 2009; 4(1):44 & Genome Biology 2003; 4(5):P3 within any publication that makes use of any methods inspired by DAVID.
Term of Service | Contact Us | Site Map

## Sheet: 4+S
4+S
CLUSTER MEDIUM
136 Cluster(s)
Annotation Cluster 1		Enrichment Score: 4.49		Count	P_Value	Benjamini
	GOTERM_BP_FAT	regulation of transcription		204	4.7e-07	0.0014
	GOTERM_BP_FAT	transcription		171	5.9e-07	0.00084
	GOTERM_BP_FAT	regulation of RNA metabolic process		133	0.0015	0.15
	GOTERM_BP_FAT	regulation of transcription, DNA-dependent		129	0.0025	0.19
Annotation Cluster 2		Enrichment Score: 3.65		Count	P_Value	Benjamini
	GOTERM_BP_FAT	vesicle-mediated transport		57	6.1e-05	0.025
	GOTERM_BP_FAT	membrane invagination		28	0.00014	0.039
	GOTERM_BP_FAT	endocytosis		28	0.00014	0.039
	GOTERM_BP_FAT	membrane organization		37	0.002	0.18
Annotation Cluster 3		Enrichment Score: 3.4
	GOTERM_BP_FAT	response to DNA damage stimulus		42	4.2e-05	0.02
	GOTERM_BP_FAT	DNA repair		32	0.00039	0.083
	GOTERM_BP_FAT	DNA metabolic process		47	0.0012	0.16
	GOTERM_BP_FAT	cellular response to stress		51	0.0014	0.16
Annotation Cluster 4		Enrichment Score: 3.25		Count	P_Value	Benjamini
	GOTERM_BP_FAT	cell cycle		77	2.2e-06	0.0021
	GOTERM_BP_FAT	cell cycle process		60	4.5e-06	0.0032
	GOTERM_BP_FAT	mitotic cell cycle		41	7.4e-05	0.026
	GOTERM_BP_FAT	cell cycle phase		43	0.0002	0.048
	GOTERM_BP_FAT	cell division		31	0.0015	0.15
	GOTERM_BP_FAT	M phase		32	0.0042	0.24
	GOTERM_BP_FAT	M phase of mitotic cell cycle		24	0.0046	0.25
	GOTERM_BP_FAT	mitosis		23	0.0075	0.33
	GOTERM_BP_FAT	nuclear division		23	0.0075	0.33
	GOTERM_BP_FAT	organelle fission		23	0.012	0.4
Annotation Cluster 5		Enrichment Score: 2.58		Count	P_Value	Benjamini
	GOTERM_BP_FAT	chromatin modification		33	9.2e-05	0.029
	GOTERM_BP_FAT	chromosome organization		46	0.00087	0.14
	GOTERM_BP_FAT	chromatin organization		35	0.0057	0.28
	GOTERM_BP_FAT	covalent chromatin modification		12	0.11	0.82
Annotation Cluster 6		Enrichment Score: 2.31		Count	P_Value	Benjamini
	GOTERM_BP_FAT	actin filament organization		12	0.0024	0.19
	GOTERM_BP_FAT	actin cytoskeleton organization		25	0.0025	0.19
	GOTERM_BP_FAT	actin filament-based process		25	0.0056	0.29
	GOTERM_BP_FAT	cytoskeleton organization		37	0.017	0.44
Annotation Cluster 7		Enrichment Score: 2.26		Count	P_Value	Benjamini
	GOTERM_BP_FAT	cellular macromolecule catabolic process		64	0.00053	0.1
	GOTERM_BP_FAT	macromolecule catabolic process		65	0.002	0.17
	GOTERM_BP_FAT	proteolysis involved in cellular protein catabolic process		52	0.0028	0.19
	GOTERM_BP_FAT	cellular protein catabolic process		52	0.003	0.2
	GOTERM_BP_FAT	protein catabolic process		52	0.0056	0.29
	GOTERM_BP_FAT	modification-dependent protein catabolic process		48	0.0079	0.34
	GOTERM_BP_FAT	modification-dependent macromolecule catabolic process		48	0.0079	0.34
	GOTERM_BP_FAT	ubiquitin-dependent protein catabolic process		24	0.011	0.39
	GOTERM_BP_FAT	proteolysis		70	0.12	0.84
Annotation Cluster 8		Enrichment Score: 2.15		Count	P_Value	Benjamini
	GOTERM_BP_FAT	protein localization		73	0.0012	0.16
	GOTERM_BP_FAT	establishment of protein localization		65	0.0014	0.16
	GOTERM_BP_FAT	protein transport		64	0.0018	0.17
	GOTERM_BP_FAT	cellular macromolecule localization		39	0.0026	0.18
	GOTERM_BP_FAT	cellular protein localization		37	0.0069	0.32
	GOTERM_BP_FAT	intracellular protein transport		34	0.0085	0.33
	GOTERM_BP_FAT	intracellular transport		51	0.022	0.52
	GOTERM_BP_FAT	protein import		14	0.036	0.63
	GOTERM_BP_FAT	protein targeting		18	0.11	0.82
Annotation Cluster 9		Enrichment Score: 2.02		Count	P_Value	Benjamini
	GOTERM_BP_FAT	negative regulation of macromolecule metabolic process		67	0.00014	0.036
	GOTERM_BP_FAT	negative regulation of gene expression		45	0.0032	0.21
	GOTERM_BP_FAT	negative regulation of nucleobase, nucleoside, nucleotide and nucleic acid metabolic process		44	0.0071	0.32
	GOTERM_BP_FAT	negative regulation of cellular biosynthetic process		47	0.0083	0.35
	GOTERM_BP_FAT	negative regulation of macromolecule biosynthetic process		46	0.0084	0.34
	GOTERM_BP_FAT	negative regulation of nitrogen compound metabolic process		44	0.0088	0.34
	GOTERM_BP_FAT	negative regulation of biosynthetic process		47	0.012	0.39
	GOTERM_BP_FAT	negative regulation of transcription		39	0.014	0.42
	GOTERM_BP_FAT	negative regulation of transcription, DNA-dependent		30	0.034	0.62
	GOTERM_BP_FAT	negative regulation of RNA metabolic process		30	0.041	0.66
	GOTERM_BP_FAT	negative regulation of transcription from RNA polymerase II promoter		21	0.13	0.84
Annotation Cluster 10		Enrichment Score: 1.89		Count	P_Value	Benjamini
	GOTERM_BP_FAT	regulation of apoptosis		68	0.0011	0.17
	GOTERM_BP_FAT	regulation of programmed cell death		68	0.0014	0.17
	GOTERM_BP_FAT	regulation of cell death		68	0.0015	0.16
	GOTERM_BP_FAT	programmed cell death		50	0.0098	0.36
	GOTERM_BP_FAT	induction of apoptosis by extracellular signals		14	0.011	0.4
	GOTERM_BP_FAT	negative regulation of apoptosis		32	0.012	0.39
	GOTERM_BP_FAT	positive regulation of apoptosis		37	0.013	0.42
	GOTERM_BP_FAT	negative regulation of programmed cell death		32	0.014	0.43
	GOTERM_BP_FAT	negative regulation of cell death		32	0.015	0.44
	GOTERM_BP_FAT	positive regulation of programmed cell death		37	0.015	0.43
	GOTERM_BP_FAT	cell death		56	0.015	0.44
	GOTERM_BP_FAT	positive regulation of cell death		37	0.016	0.44
	GOTERM_BP_FAT	apoptosis		48	0.018	0.46
	GOTERM_BP_FAT	death		56	0.018	0.46
	GOTERM_BP_FAT	induction of apoptosis		26	0.069	0.76
	GOTERM_BP_FAT	induction of programmed cell death		26	0.071	0.76
	GOTERM_BP_FAT	anti-apoptosis		16	0.2	0.91
Annotation Cluster 11		Enrichment Score: 1.84		Count	P_Value	Benjamini
	GOTERM_BP_FAT	protein complex biogenesis		47	0.0011	0.16
	GOTERM_BP_FAT	protein complex assembly		47	0.0011	0.16
	GOTERM_BP_FAT	macromolecular complex subunit organization		60	0.0022	0.18
	GOTERM_BP_FAT	macromolecular complex assembly		56	0.0034	0.21
	GOTERM_BP_FAT	cellular macromolecular complex subunit organization		27	0.12	0.84
	GOTERM_BP_FAT	cellular protein complex assembly		12	0.32	0.96
	GOTERM_BP_FAT	cellular macromolecular complex assembly		21	0.36	0.97
Annotation Cluster 12		Enrichment Score: 1.79		Count	P_Value	Benjamini
	GOTERM_BP_FAT	phosphorylation		63	0.0082	0.35
	GOTERM_BP_FAT	protein amino acid phosphorylation		53	0.013	0.42
	GOTERM_BP_FAT	phosphorus metabolic process		71	0.025	0.55
	GOTERM_BP_FAT	phosphate metabolic process		71	0.025	0.55
Annotation Cluster 13		Enrichment Score: 1.71		Count	P_Value	Benjamini
	GOTERM_BP_FAT	posttranscriptional regulation of gene expression		23	0.0046	0.26
	GOTERM_BP_FAT	regulation of cellular protein metabolic process		38	0.032	0.61
	GOTERM_BP_FAT	regulation of translation		14	0.049	0.7
Annotation Cluster 14		Enrichment Score: 1.67		Count	P_Value	Benjamini
	GOTERM_BP_FAT	interphase of mitotic cell cycle		13	0.014	0.42
	GOTERM_BP_FAT	interphase		13	0.018	0.46
	GOTERM_BP_FAT	G1/S transition of mitotic cell cycle		8	0.039	0.65
Annotation Cluster 15		Enrichment Score: 1.63		Count	P_Value	Benjamini
	GOTERM_BP_FAT	RNA processing		49	0.0019	0.17
	GOTERM_BP_FAT	RNA splicing, via transesterification reactions with bulged adenosine as nucleophile		16	0.028	0.58
	GOTERM_BP_FAT	RNA splicing, via transesterification reactions		16	0.028	0.58
	GOTERM_BP_FAT	nuclear mRNA splicing, via spliceosome		16	0.028	0.58
	GOTERM_BP_FAT	RNA splicing		25	0.035	0.62
	GOTERM_BP_FAT	mRNA processing		27	0.045	0.68
	GOTERM_BP_FAT	mRNA metabolic process		30	0.051	0.71
Annotation Cluster 16		Enrichment Score: 1.34		Count	P_Value	Benjamini
	GOTERM_BP_FAT	regulation of transcription from RNA polymerase II promoter		72	5.3e-06	0.003
	GOTERM_BP_FAT	positive regulation of transcription from RNA polymerase II promoter		31	0.034	0.61
	GOTERM_BP_FAT	positive regulation of transcription, DNA-dependent		36	0.076	0.77
	GOTERM_BP_FAT	positive regulation of RNA metabolic process		36	0.083	0.78
	GOTERM_BP_FAT	positive regulation of nucleobase, nucleoside, nucleotide and nucleic acid metabolic process		45	0.085	0.78
	GOTERM_BP_FAT	positive regulation of nitrogen compound metabolic process		46	0.088	0.79
	GOTERM_BP_FAT	positive regulation of transcription		41	0.09	0.78
	GOTERM_BP_FAT	positive regulation of macromolecule metabolic process		59	0.097	0.8
	GOTERM_BP_FAT	positive regulation of gene expression		41	0.12	0.84
	GOTERM_BP_FAT	positive regulation of macromolecule biosynthetic process		45	0.14	0.86
	GOTERM_BP_FAT	positive regulation of cellular biosynthetic process		45	0.22	0.93
	GOTERM_BP_FAT	positive regulation of biosynthetic process		45	0.25	0.94
Annotation Cluster 17		Enrichment Score: 1.33		Count	P_Value	Benjamini
	GOTERM_BP_FAT	leukocyte activation during immune response		8	0.0037	0.23
	GOTERM_BP_FAT	cell activation during immune response		8	0.0037	0.23
	GOTERM_BP_FAT	T-helper cell differentiation		3	0.018	0.46
	GOTERM_BP_FAT	CD4-positive, alpha-beta T cell differentiation during immune response		3	0.018	0.46
	GOTERM_BP_FAT	alpha-beta T cell activation during immune response		3	0.029	0.58
	GOTERM_BP_FAT	T cell differentiation during immune response		3	0.029	0.58
	GOTERM_BP_FAT	alpha-beta T cell differentiation during immune response		3	0.029	0.58
	GOTERM_BP_FAT	T cell activation during immune response		4	0.034	0.61
	GOTERM_BP_FAT	CD4-positive, alpha beta T cell differentiation		3	0.042	0.66
	GOTERM_BP_FAT	lymphocyte activation during immune response		4	0.08	0.78
	GOTERM_BP_FAT	alpha-beta T cell differentiation		3	0.19	0.91
	GOTERM_BP_FAT	alpha-beta T cell activation		3	0.27	0.95
	GOTERM_BP_FAT	T cell differentiation		5	0.51	0.99
	GOTERM_BP_FAT	T cell activation		7	0.73	1
Annotation Cluster 18		Enrichment Score: 1.29		Count	P_Value	Benjamini
	GOTERM_BP_FAT	cellular protein localization		37	0.0069	0.32
	GOTERM_BP_FAT	intracellular protein transport		34	0.0085	0.33
	GOTERM_BP_FAT	protein import		14	0.036	0.63
	GOTERM_BP_FAT	protein localization in nucleus		11	0.041	0.66
	GOTERM_BP_FAT	protein import into nucleus		10	0.056	0.73
	GOTERM_BP_FAT	nucleocytoplasmic transport		15	0.062	0.74
	GOTERM_BP_FAT	nuclear import		10	0.063	0.75
	GOTERM_BP_FAT	nuclear transport		15	0.068	0.76
	GOTERM_BP_FAT	protein targeting		18	0.11	0.82
	GOTERM_BP_FAT	protein localization in organelle		13	0.13	0.84
	GOTERM_BP_FAT	protein import into nucleus, translocation		4	0.31	0.96
Annotation Cluster 19		Enrichment Score: 1.29		Count	P_Value	Benjamini
	GOTERM_BP_FAT	angiogenesis		16	0.022	0.52
	GOTERM_BP_FAT	blood vessel morphogenesis		19	0.057	0.73
	GOTERM_BP_FAT	blood vessel development		21	0.068	0.76
	GOTERM_BP_FAT	vasculature development		21	0.082	0.78
Annotation Cluster 20		Enrichment Score: 1.26		Count	P_Value	Benjamini
	GOTERM_BP_FAT	cell activation during immune response		8	0.0037	0.23
	GOTERM_BP_FAT	leukocyte activation during immune response		8	0.0037	0.23
	GOTERM_BP_FAT	myeloid leukocyte mediated immunity		4	0.05	0.7
	GOTERM_BP_FAT	myeloid cell activation during immune response		4	0.08	0.78
	GOTERM_BP_FAT	immune effector process		12	0.14	0.86
	GOTERM_BP_FAT	leukocyte degranulation		3	0.15	0.86
	GOTERM_BP_FAT	myeloid leukocyte activation		5	0.27	0.94
	GOTERM_BP_FAT	regulated secretory pathway		3	0.27	0.95
Annotation Cluster 21		Enrichment Score: 1.26		Count	P_Value	Benjamini
	GOTERM_BP_FAT	methylation-dependent chromatin silencing		3	0.029	0.58
	GOTERM_BP_FAT	gene silencing		8	0.039	0.65
	GOTERM_BP_FAT	chromatin remodeling		8	0.039	0.65
	GOTERM_BP_FAT	regulation of gene expression, epigenetic		9	0.072	0.76
	GOTERM_BP_FAT	chromatin silencing		4	0.08	0.78
	GOTERM_BP_FAT	negative regulation of gene expression, epigenetic		4	0.11	0.83
Annotation Cluster 22		Enrichment Score: 1.17		Count	P_Value	Benjamini
	GOTERM_BP_FAT	regulation of small GTPase mediated signal transduction		23	0.031	0.6
	GOTERM_BP_FAT	regulation of Ras protein signal transduction		18	0.092	0.78
	GOTERM_BP_FAT	regulation of Rho protein signal transduction		10	0.11	0.83
Annotation Cluster 23		Enrichment Score: 1.13		Count	P_Value	Benjamini
	GOTERM_BP_FAT	response to molecule of bacterial origin		11	0.024	0.54
	GOTERM_BP_FAT	response to lipopolysaccharide		10	0.031	0.6
	GOTERM_BP_FAT	response to bacterium		12	0.55	0.99
Annotation Cluster 24		Enrichment Score: 1.11		Count	P_Value	Benjamini
	GOTERM_BP_FAT	negative regulation of transferase activity		13	0.0083	0.34
	GOTERM_BP_FAT	negative regulation of kinase activity		12	0.013	0.42
	GOTERM_BP_FAT	regulation of phosphorylation		38	0.026	0.56
	GOTERM_BP_FAT	negative regulation of protein kinase activity		11	0.026	0.56
	GOTERM_BP_FAT	negative regulation of catalytic activity		25	0.027	0.57
	GOTERM_BP_FAT	negative regulation of molecular function		28	0.043	0.66
	GOTERM_BP_FAT	regulation of phosphorus metabolic process		38	0.044	0.67
	GOTERM_BP_FAT	regulation of phosphate metabolic process		38	0.044	0.67
	GOTERM_BP_FAT	regulation of transferase activity		29	0.081	0.78
	GOTERM_BP_FAT	regulation of kinase activity		28	0.082	0.77
	GOTERM_BP_FAT	regulation of protein kinase activity		27	0.089	0.78
	GOTERM_BP_FAT	positive regulation of catalytic activity		35	0.23	0.93
	GOTERM_BP_FAT	activation of protein kinase activity		9	0.33	0.97
	GOTERM_BP_FAT	positive regulation of kinase activity		14	0.56	0.99
	GOTERM_BP_FAT	positive regulation of transferase activity		14	0.62	1
	GOTERM_BP_FAT	positive regulation of protein kinase activity		13	0.63	1
Annotation Cluster 25		Enrichment Score: 1.1		Count	P_Value	Benjamini
	GOTERM_BP_FAT	regulation of epidermal growth factor receptor signaling pathway		6	0.0085	0.34
	GOTERM_BP_FAT	regulation of epidermal growth factor receptor activity		3	0.21	0.92
	GOTERM_BP_FAT	regulation of receptor activity		3	0.27	0.95
Annotation Cluster 26		Enrichment Score: 1.09		Count	P_Value	Benjamini
	GOTERM_BP_FAT	biopolymer methylation		10	0.016	0.44
	GOTERM_BP_FAT	methylation		10	0.029	0.58
	GOTERM_BP_FAT	one-carbon metabolic process		12	0.055	0.72
	GOTERM_BP_FAT	protein amino acid methylation		5	0.18	0.9
	GOTERM_BP_FAT	protein amino acid alkylation		5	0.18	0.9
	GOTERM_BP_FAT	histone methylation		3	0.36	0.97
Annotation Cluster 27		Enrichment Score: 0.97		Count	P_Value	Benjamini
	GOTERM_BP_FAT	response to oxidative stress		16	0.048	0.69
	GOTERM_BP_FAT	response to reactive oxygen species		9	0.063	0.74
	GOTERM_BP_FAT	response to inorganic substance		16	0.19	0.91
	GOTERM_BP_FAT	response to hydrogen peroxide		6	0.21	0.92
Annotation Cluster 28		Enrichment Score: 0.97		Count	P_Value	Benjamini
	GOTERM_BP_FAT	RNA localization		11	0.059	0.74
	GOTERM_BP_FAT	RNA transport		10	0.1	0.81
	GOTERM_BP_FAT	establishment of RNA localization		10	0.1	0.81
	GOTERM_BP_FAT	nucleic acid transport		10	0.1	0.81
	GOTERM_BP_FAT	nucleobase, nucleoside, nucleotide and nucleic acid transport		11	0.11	0.83
	GOTERM_BP_FAT	mRNA transport		8	0.23	0.93
Annotation Cluster 29		Enrichment Score: 0.96		Count	P_Value	Benjamini
	GOTERM_BP_FAT	positive regulation of specific transcription from RNA polymerase II promoter		8	0.042	0.66
	GOTERM_BP_FAT	regulation of specific transcription from RNA polymerase II promoter		10	0.088	0.78
	GOTERM_BP_FAT	positive regulation of gene-specific transcription		9	0.12	0.84
	GOTERM_BP_FAT	negative regulation of gene-specific transcription		6	0.14	0.85
	GOTERM_BP_FAT	regulation of gene-specific transcription		12	0.14	0.86
	GOTERM_BP_FAT	negative regulation of specific transcription from RNA polymerase II promoter		5	0.2	0.91
Annotation Cluster 30		Enrichment Score: 0.88		Count	P_Value	Benjamini
	GOTERM_BP_FAT	telomere maintenance		5	0.073	0.76
	GOTERM_BP_FAT	telomere organization		5	0.081	0.78
	GOTERM_BP_FAT	anatomical structure homeostasis		8	0.4	0.98
Annotation Cluster 31		Enrichment Score: 0.85		Count	P_Value	Benjamini
	GOTERM_BP_FAT	double-strand break repair via nonhomologous end joining		3	0.11	0.82
	GOTERM_BP_FAT	double-strand break repair		7	0.14	0.86
	GOTERM_BP_FAT	non-recombinational repair		3	0.19	0.91
Annotation Cluster 32		Enrichment Score: 0.8		Count	P_Value	Benjamini
	GOTERM_BP_FAT	transcription initiation from RNA polymerase II promoter		9	0.039	0.65
	GOTERM_BP_FAT	transcription initiation		10	0.046	0.68
	GOTERM_BP_FAT	transcription, DNA-dependent		23	0.11	0.83
	GOTERM_BP_FAT	RNA biosynthetic process		23	0.12	0.84
	GOTERM_BP_FAT	transcription from RNA polymerase II promoter		18	0.18	0.9
	GOTERM_BP_FAT	androgen receptor signaling pathway		4	0.34	0.97
	GOTERM_BP_FAT	steroid hormone receptor signaling pathway		5	0.42	0.98
	GOTERM_BP_FAT	intracellular receptor-mediated signaling pathway		5	0.63	1
Annotation Cluster 33		Enrichment Score: 0.8		Count	P_Value	Benjamini
	GOTERM_BP_FAT	cell cycle checkpoint		10	0.075	0.77
	GOTERM_BP_FAT	DNA damage response, signal transduction		9	0.085	0.78
	GOTERM_BP_FAT	DNA damage checkpoint		5	0.29	0.95
	GOTERM_BP_FAT	DNA integrity checkpoint		5	0.35	0.97
Annotation Cluster 34		Enrichment Score: 0.78		Count	P_Value	Benjamini
	GOTERM_BP_FAT	regulation of osteoblast differentiation		7	0.034	0.62
	GOTERM_BP_FAT	negative regulation of osteoblast differentiation		3	0.19	0.91
	GOTERM_BP_FAT	regulation of ossification		7	0.29	0.95
	GOTERM_BP_FAT	positive regulation of osteoblast differentiation		3	0.42	0.98
Annotation Cluster 35		Enrichment Score: 0.77		Count	P_Value	Benjamini
	GOTERM_BP_FAT	chromosome segregation		10	0.041	0.66
	GOTERM_BP_FAT	mitotic sister chromatid segregation		4	0.34	0.97
	GOTERM_BP_FAT	sister chromatid segregation		4	0.35	0.97
Annotation Cluster 36		Enrichment Score: 0.75		Count	P_Value	Benjamini
	GOTERM_BP_FAT	B cell activation		9	0.067	0.76
	GOTERM_BP_FAT	leukocyte differentiation		12	0.13	0.84
	GOTERM_BP_FAT	lymphocyte differentiation		10	0.13	0.85
	GOTERM_BP_FAT	B cell differentiation		6	0.14	0.85
	GOTERM_BP_FAT	leukocyte activation		19	0.15	0.87
	GOTERM_BP_FAT	immune system development		21	0.16	0.88
	GOTERM_BP_FAT	lymphocyte activation		16	0.17	0.88
	GOTERM_BP_FAT	hemopoiesis		18	0.19	0.91
	GOTERM_BP_FAT	cell activation		21	0.21	0.92
	GOTERM_BP_FAT	hemopoietic or lymphoid organ development		18	0.31	0.96
	GOTERM_BP_FAT	T cell activation		7	0.73	1
Annotation Cluster 37		Enrichment Score: 0.75		Count	P_Value	Benjamini
	GOTERM_BP_FAT	tRNA modification		4	0.059	0.74
	GOTERM_BP_FAT	tRNA metabolic process		11	0.14	0.85
	GOTERM_BP_FAT	RNA modification		5	0.29	0.95
	GOTERM_BP_FAT	tRNA processing		6	0.44	0.98
Annotation Cluster 38		Enrichment Score: 0.74		Count	P_Value	Benjamini
	GOTERM_BP_FAT	regulation of DNA binding		12	0.085	0.78
	GOTERM_BP_FAT	regulation of binding		14	0.098	0.8
	GOTERM_BP_FAT	regulation of transcription factor activity		10	0.13	0.85
	GOTERM_BP_FAT	positive regulation of binding		8	0.16	0.87
	GOTERM_BP_FAT	positive regulation of DNA binding		7	0.21	0.92
	GOTERM_BP_FAT	positive regulation of transcription factor activity		6	0.26	0.94
	GOTERM_BP_FAT	positive regulation of NF-kappaB transcription factor activity		3	0.69	1
Annotation Cluster 39		Enrichment Score: 0.74		Count	P_Value	Benjamini
	GOTERM_BP_FAT	T-helper 1 type immune response		4	0.016	0.45
	GOTERM_BP_FAT	leukocyte mediated immunity		10	0.056	0.73
	GOTERM_BP_FAT	immune effector process		12	0.14	0.86
	GOTERM_BP_FAT	adaptive immune response based on somatic recombination of immune receptors built from immunoglobulin superfamily domains		8	0.15	0.86
	GOTERM_BP_FAT	adaptive immune response		8	0.15	0.86
	GOTERM_BP_FAT	lymphocyte mediated immunity		6	0.37	0.97
	GOTERM_BP_FAT	immunoglobulin mediated immune response		5	0.37	0.97
	GOTERM_BP_FAT	B cell mediated immunity		5	0.4	0.98
	GOTERM_BP_FAT	humoral immune response		6	0.47	0.99
	GOTERM_BP_FAT	humoral immune response mediated by circulating immunoglobulin		3	0.53	0.99
Annotation Cluster 40		Enrichment Score: 0.74		Count	P_Value	Benjamini
	GOTERM_BP_FAT	regulation of cellular protein metabolic process		38	0.032	0.61
	GOTERM_BP_FAT	regulation of ubiquitin-protein ligase activity		9	0.076	0.77
	GOTERM_BP_FAT	negative regulation of ubiquitin-protein ligase activity		8	0.086	0.78
	GOTERM_BP_FAT	negative regulation of ligase activity		8	0.086	0.78
	GOTERM_BP_FAT	regulation of ligase activity		9	0.09	0.78
	GOTERM_BP_FAT	negative regulation of cellular protein metabolic process		16	0.091	0.78
	GOTERM_BP_FAT	negative regulation of protein metabolic process		16	0.12	0.83
	GOTERM_BP_FAT	negative regulation of protein ubiquitination		8	0.13	0.84
	GOTERM_BP_FAT	negative regulation of ubiquitin-protein ligase activity during mitotic cell cycle		7	0.17	0.88
	GOTERM_BP_FAT	positive regulation of ubiquitin-protein ligase activity during mitotic cell cycle		7	0.19	0.91
	GOTERM_BP_FAT	positive regulation of ubiquitin-protein ligase activity		7	0.21	0.92
	GOTERM_BP_FAT	regulation of protein ubiquitination		9	0.21	0.92
	GOTERM_BP_FAT	regulation of ubiquitin-protein ligase activity during mitotic cell cycle		7	0.22	0.92
	GOTERM_BP_FAT	positive regulation of ligase activity		7	0.24	0.93
	GOTERM_BP_FAT	negative regulation of protein modification process		10	0.24	0.93
	GOTERM_BP_FAT	regulation of protein modification process		21	0.24	0.93
	GOTERM_BP_FAT	anaphase-promoting complex-dependent proteasomal ubiquitin-dependent protein catabolic process		6	0.31	0.96
	GOTERM_BP_FAT	positive regulation of protein metabolic process		17	0.31	0.96
	GOTERM_BP_FAT	positive regulation of protein ubiquitination		7	0.35	0.97
	GOTERM_BP_FAT	positive regulation of cellular protein metabolic process		16	0.35	0.97
	GOTERM_BP_FAT	positive regulation of protein modification process		13	0.38	0.98
	GOTERM_BP_FAT	proteasomal protein catabolic process		7	0.53	0.99
	GOTERM_BP_FAT	proteasomal ubiquitin-dependent protein catabolic process		7	0.53	0.99
Annotation Cluster 41		Enrichment Score: 0.71		Count	P_Value	Benjamini
	GOTERM_BP_FAT	regulation of neuron differentiation		15	0.02	0.48
	GOTERM_BP_FAT	regulation of neurogenesis		16	0.052	0.71
	GOTERM_BP_FAT	negative regulation of cellular component organization		14	0.062	0.75
	GOTERM_BP_FAT	negative regulation of cell projection organization		5	0.073	0.76
	GOTERM_BP_FAT	regulation of cell development		17	0.13	0.84
	GOTERM_BP_FAT	regulation of nervous system development		16	0.13	0.85
	GOTERM_BP_FAT	negative regulation of axonogenesis		4	0.17	0.89
	GOTERM_BP_FAT	regulation of neuron projection development		7	0.21	0.92
	GOTERM_BP_FAT	regulation of cell projection organization		8	0.24	0.93
	GOTERM_BP_FAT	positive regulation of neurogenesis		6	0.25	0.93
	GOTERM_BP_FAT	regulation of cell morphogenesis involved in differentiation		7	0.28	0.95
	GOTERM_BP_FAT	positive regulation of cell projection organization		5	0.28	0.95
	GOTERM_BP_FAT	negative regulation of cell development		5	0.29	0.95
	GOTERM_BP_FAT	regulation of cell morphogenesis		10	0.33	0.97
	GOTERM_BP_FAT	positive regulation of cell development		6	0.36	0.97
	GOTERM_BP_FAT	regulation of axonogenesis		5	0.41	0.98
	GOTERM_BP_FAT	positive regulation of axonogenesis		3	0.42	0.98
	GOTERM_BP_FAT	negative regulation of neurogenesis		4	0.48	0.99
	GOTERM_BP_FAT	positive regulation of cellular component organization		10	0.71	1
Annotation Cluster 42		Enrichment Score: 0.7		Count	P_Value	Benjamini
	GOTERM_BP_FAT	activation of caspase activity		7	0.086	0.78
	GOTERM_BP_FAT	positive regulation of caspase activity		7	0.12	0.84
	GOTERM_BP_FAT	positive regulation of peptidase activity		7	0.12	0.84
	GOTERM_BP_FAT	regulation of caspase activity		8	0.16	0.88
	GOTERM_BP_FAT	regulation of endopeptidase activity		8	0.19	0.9
	GOTERM_BP_FAT	regulation of peptidase activity		8	0.22	0.92
	GOTERM_BP_FAT	regulation of hydrolase activity		20	0.56	0.99
	GOTERM_BP_FAT	positive regulation of hydrolase activity		11	0.57	0.99
Annotation Cluster 43		Enrichment Score: 0.69		Count	P_Value	Benjamini
	GOTERM_BP_FAT	meiosis		9	0.2	0.91
	GOTERM_BP_FAT	M phase of meiotic cell cycle		9	0.2	0.91
	GOTERM_BP_FAT	meiotic cell cycle		9	0.21	0.92
	GOTERM_BP_FAT	meiosis I		5	0.22	0.92
Annotation Cluster 44		Enrichment Score: 0.69		Count	P_Value	Benjamini
	GOTERM_BP_FAT	response to UV-C		3	0.042	0.66
	GOTERM_BP_FAT	response to UV		7	0.12	0.84
	GOTERM_BP_FAT	multicellular organismal aging		3	0.15	0.86
	GOTERM_BP_FAT	response to radiation		14	0.35	0.97
	GOTERM_BP_FAT	response to abiotic stimulus		23	0.44	0.98
	GOTERM_BP_FAT	response to light stimulus		8	0.68	1
Annotation Cluster 45		Enrichment Score: 0.68		Count	P_Value	Benjamini
	GOTERM_BP_FAT	somatic diversification of immune receptors via somatic mutation		3	0.09	0.78
	GOTERM_BP_FAT	somatic hypermutation of immunoglobulin genes		3	0.09	0.78
	GOTERM_BP_FAT	DNA recombination		10	0.14	0.86
	GOTERM_BP_FAT	somatic diversification of immune receptors via germline recombination within a single locus		4	0.15	0.87
	GOTERM_BP_FAT	somatic cell DNA recombination		4	0.15	0.87
	GOTERM_BP_FAT	somatic diversification of immune receptors		4	0.2	0.91
	GOTERM_BP_FAT	somatic recombination of immunoglobulin gene segments		3	0.27	0.95
	GOTERM_BP_FAT	somatic diversification of immunoglobulins		3	0.36	0.97
	GOTERM_BP_FAT	immunoglobulin production		3	0.52	0.99
	GOTERM_BP_FAT	production of molecular mediator of immune response		3	0.53	0.99
Annotation Cluster 46		Enrichment Score: 0.68		Count	P_Value	Benjamini
	GOTERM_BP_FAT	macromolecular complex disassembly		4	0.18	0.9
	GOTERM_BP_FAT	cellular macromolecular complex disassembly		4	0.18	0.9
	GOTERM_BP_FAT	cellular component disassembly		6	0.18	0.9
	GOTERM_BP_FAT	cellular protein complex disassembly		3	0.25	0.94
	GOTERM_BP_FAT	protein complex disassembly		3	0.25	0.94
Annotation Cluster 47		Enrichment Score: 0.68		Count	P_Value	Benjamini
	GOTERM_BP_FAT	DNA damage response, signal transduction		9	0.085	0.78
	GOTERM_BP_FAT	DNA damage response, signal transduction resulting in induction of apoptosis		4	0.29	0.95
	GOTERM_BP_FAT	induction of apoptosis by intracellular signals		5	0.37	0.97
Annotation Cluster 48		Enrichment Score: 0.66		Count	P_Value	Benjamini
	GOTERM_BP_FAT	protein modification by small protein conjugation or removal		13	0.2	0.91
	GOTERM_BP_FAT	protein modification by small protein conjugation		11	0.22	0.92
	GOTERM_BP_FAT	protein ubiquitination		10	0.24	0.93
Annotation Cluster 49		Enrichment Score: 0.65		Count	P_Value	Benjamini
	GOTERM_BP_FAT	ncRNA metabolic process		20	0.067	0.76
	GOTERM_BP_FAT	ncRNA processing		16	0.12	0.83
	GOTERM_BP_FAT	rRNA processing		8	0.27	0.95
	GOTERM_BP_FAT	rRNA metabolic process		8	0.31	0.96
	GOTERM_BP_FAT	ribonucleoprotein complex biogenesis		13	0.33	0.97
	GOTERM_BP_FAT	ribosome biogenesis		8	0.55	0.99
Annotation Cluster 50		Enrichment Score: 0.65		Count	P_Value	Benjamini
	GOTERM_BP_FAT	maintenance of location in cell		6	0.14	0.85
	GOTERM_BP_FAT	maintenance of protein location in cell		5	0.2	0.91
	GOTERM_BP_FAT	maintenance of protein location		5	0.29	0.95
	GOTERM_BP_FAT	maintenance of location		6	0.3	0.96
Annotation Cluster 51		Enrichment Score: 0.65		Count	P_Value	Benjamini
	GOTERM_BP_FAT	tRNA metabolic process		11	0.14	0.85
	GOTERM_BP_FAT	tRNA aminoacylation for protein translation		5	0.27	0.94
	GOTERM_BP_FAT	tRNA aminoacylation		5	0.27	0.94
	GOTERM_BP_FAT	amino acid activation		5	0.27	0.94
Annotation Cluster 52		Enrichment Score: 0.63		Count	P_Value	Benjamini
	GOTERM_BP_FAT	regulation of insulin receptor signaling pathway		4	0.091	0.78
	GOTERM_BP_FAT	negative regulation of insulin receptor signaling pathway		3	0.21	0.92
	GOTERM_BP_FAT	negative regulation of response to stimulus		6	0.68	1
Annotation Cluster 53		Enrichment Score: 0.62		Count	P_Value	Benjamini
	GOTERM_BP_FAT	regulation of gene expression, epigenetic		9	0.072	0.76
	GOTERM_BP_FAT	DNA modification		4	0.29	0.95
	GOTERM_BP_FAT	DNA methylation		3	0.4	0.98
	GOTERM_BP_FAT	DNA alkylation		3	0.4	0.98
Annotation Cluster 54		Enrichment Score: 0.61		Count	P_Value	Benjamini
	GOTERM_BP_FAT	anagen		3	0.09	0.78
	GOTERM_BP_FAT	hair follicle maturation		3	0.17	0.89
	GOTERM_BP_FAT	epidermis morphogenesis		4	0.17	0.89
	GOTERM_BP_FAT	molting cycle process		5	0.22	0.92
	GOTERM_BP_FAT	hair cycle process		5	0.22	0.92
	GOTERM_BP_FAT	hair follicle development		5	0.22	0.92
	GOTERM_BP_FAT	hair cycle		5	0.23	0.93
	GOTERM_BP_FAT	molting cycle		5	0.23	0.93
	GOTERM_BP_FAT	epidermis development		12	0.48	0.99
	GOTERM_BP_FAT	developmental growth		6	0.56	0.99
	GOTERM_BP_FAT	ectoderm development		12	0.59	1
Annotation Cluster 55		Enrichment Score: 0.6		Count	P_Value	Benjamini
	GOTERM_BP_FAT	in utero embryonic development		15	0.13	0.85
	GOTERM_BP_FAT	chordate embryonic development		22	0.34	0.97
	GOTERM_BP_FAT	embryonic development ending in birth or egg hatching		22	0.35	0.97
